**Contribution of *trans* regulatory eQTL to cryptic genetic variation in *C. elegans***

L. Basten Snoek<sup>1,3</sup>, Mark G. Sterken<sup>1,3</sup>, Roel P. J. Bevers<sup>1</sup>, Rita J. M. Volkers<sup>1</sup>, Arjen van't Hof<sup>2</sup>,  
Rachel Brenchley<sup>2</sup>, Joost A. G. Riksen<sup>1</sup>, Andrew Cossins<sup>2</sup>, Jan E. Kammenga<sup>1,4</sup>

<sup>1</sup>Laboratory of Nematology, Wageningen University, 6708 PB, The Netherlands.

<sup>2</sup>Centre for Genome research, Institute of Integrative Biology, Biosciences Building, University of  
Liverpool, Liverpool L69 7ZB, United Kingdom.

<sup>3</sup>Authors contributed equally

<sup>4</sup>Corresponding author

11 Key words:

12 *Caenorhabditis elegans*, genetical genomics, eQTL, heat stress, cryptic genetic variation, *trans*-band,  
13 eQTL hotspot

14

15 Corresponding author:

16 Jan E. Kammenga

17 Wageningen University and Research, laboratory of Nematology

18 Droevendaalsesteeg 1, 6708PB, Wageningen, The Netherlands

19 0031317482998

20 Jan.kammenga@wur.nl

## Abstract

## Background

Cryptic genetic variation (CGV) is the hidden genetic variation that can be unlocked by perturbing normal conditions. CGV can drive the emergence of novel complex phenotypes through changes in gene expression. Although our theoretical understanding of CGV has thoroughly increased over the past decade, insight into polymorphic gene expression regulation underlying CGV is scarce. Here we investigated the transcriptional architecture of CGV in response to rapid temperature changes in the nematode *Caenorhabditis elegans*. We analyzed regulatory variation in gene expression (and mapped eQTL) across the course of a heat stress and recovery response in a recombinant inbred population.

## Results

We measured gene expression over three temperature treatments: i) control, ii) heat stress, and iii) recovery from heat stress. Compared to control, exposure to heat stress affected the transcription of 3305 genes, whereas 942 were affected in recovering worms. These affected genes were mainly involved in metabolism and reproduction. The gene expression pattern in recovering worms resembled both the control and the heat stress treatment. We mapped eQTL using the genetic variation of the recombinant inbred population and detected 2626 genes with an eQTL in the heat stress treatment, 1797 in the control, and 1880 in the recovery. The *cis*-eQTL were highly conserved across treatments. A considerable fraction of the *trans*-eQTL (40-57%) mapped to 19 treatment specific *trans*-bands. In contrast to *cis*-eQTL, *trans*-eQTL were highly environment specific and thus cryptic. Approximately 67% of the *trans*-eQTL were only induced in a single treatment, with heat-stress showing the most unique *trans*-eQTL.

## Conclusions

These results illustrate the highly dynamic pattern of CGV across three different environmental conditions that can be evoked by a stress response over a relatively short time-span (2 hours) and that CGV is mainly determined by response related *trans* regulatory eQTL.

## Background

Many organisms can respond to sudden changes in the ambient environmental conditions by adjusting their gene expression levels [1]. In particular invertebrates are prone to environment induced rapid gene expression changes. For instance, gene expression in the nematode *Caenorhabditis elegans* can swiftly change due to exposure to pathogens, temperature, and toxicants [2-6]. A common denominator of many of these studies is that they provide snap-shots in time of the responses elicited by these environments. As such they provide static profiles of gene expression at a given moment. Further insight into the dynamics of gene expression and gene expression regulation can be achieved by following responses over time, for example by following development or aging over time [7-9].

Gene expression regulation can be studied by investigating the transcriptional response in the context of natural variation, using genetical genomics [10]. In this approach, a genetically segregating population (*e.g.* recombinant inbred lines, RILs) is used in a transcriptomics experiment to determine the genetic architecture of gene expression. Genetical genomics has been used in many species - including *C. elegans* - and many environments. One of the marked observations comparing the different environments is the change in genetic architectures, revealing additional variation (as conceptualized by [11]). For example, the transcriptional architecture of *C. elegans* grown at 16°C or 24°C differs markedly [12]. Such studies show that the genetic architecture of gene expression is a dynamic process affected by relatively long term differences in environment or age.

But gene expression is also highly dynamic during development and growth. For example, development in *C. elegans* is a tightly regulated process that has strongly correlated patterns of gene expression [8, 9, 13]. These developmental expression dynamics can be affected by natural genetic variation [14]. Depending on the developmental stage, up to 10% of the genes show differential expression likely linked to genotype. This enabled the mapping of QTLs for gene expression dynamics during development [15].

Environmental changes can unlock genetic variation that remains hidden when in one condition but becomes apparent in another, a phenomenon called cryptic genetic variation (CGV) [16]. CGV has received quite some renewed interest over the past decade and it is suggested that CGV provides the raw material of evolution and adaptation under different environmental conditions [17].

Unlocking CGV can be achieved by altered gene expression regulation, such as the transcriptional response to changing ambient conditions. Gene regulatory networks play an important role in understanding how environmental cues affect cryptic genetic variation [18]. Here we aim to investigate the CGV of the genetic architecture over the course of a strong environmental stimulus across a recombinant inbred line (RIL) population in the nematode *C. elegans*. As stimulus we used a heat stress, since *C. elegans* strongly reacts to temperature differences [19]. Furthermore, the two parental strains of the RIL population, Bristol (N2) and Hawaii (CB4856), display extensive variation in response to heat [12, 19-21]. First, we obtained the transcriptomes of the RILs over three treatments: (i) control, 48 hours at 20°C; (ii) heat stress, 46 hours at 20°C followed by 2 hours exposure to 35°C; (iii) recovery, same as the heat stress, followed by an additional 2 hours at 20°C. The transcriptomes were used for comparing the transcriptional differences as well as the identified eQTL between the three treatments. The treatments showed strong differences in gene expression, whereby the recovery treatment showed characteristics of both the control and the heat stress treatment. Comparative analysis over the identified eQTL per treatment showed that *cis*-eQTL were strongly conserved over treatments. *Trans*-eQTL were more dynamic and display little overlap between treatments. We show that CGV is mainly manifested by *trans*-eQTL of specific sets of genes in specific environments. This makes the genetic architecture of gene expression variation an even more complex and cryptic phenomenon than previously thought.

## Methods

### *Strains used*

The wild-types N2 and CB4856 and 54 RILs derived from a CB4856 x N2 cross were used (strain generated in [12]. For 49/54 of these strains low-coverage sequencing was applied to construct a more detailed genetic map (see also [22]). A matrix with the strain names and the genetic map can be found in **Additional file 1**.

### *Nematode culturing*

The strains were kept on 6 cm Nematode Growth Medium (NGM) dishes containing *Escherichia coli* strain OP50 as food source [23]. Strains were kept in maintenance culture at 12°C, the standard growing temperature for experiments was 20°C. Fungal and bacterial infections were cleared by bleaching [23]. The strains were cleared of males prior to the experiments by selecting L2 larvae and placing them individually in a well in a 12 wells plate at 20°C. After which the populations were screened for male offspring after 3 days and only the 100% hermaphrodite populations were transferred to fresh 9 cm NGM dishes containing *E. coli* OP50 and grown until starved.

### *Control, heat stress, and recovery from heat stress experiments for transcriptomics*

The experiments were started by transferring a starved population to a fresh 9 cm NGM dish. This population was grown for 60 hours at 20°C to obtain egg laying adults, which were bleached in order to synchronize the population. The eggs were transferred to a fresh 9 cm NGM dish. Three growing conditions were applied: (i) the control treatment was grown for 48 hours at 20°C, (ii) the heat stress treatment was grown for 46 hours at 20°C followed by 2 hours at 35°C, and (iii) the recovery treatment was grown for 46 hours at 20°C, followed by 2 hours at 35°C and thereafter 2 more hours at 20°C. Directly at the end of the treatment the population was washed off the plate with M9 buffer and collected in an Eppendorf tube, which was flash frozen in liquid nitrogen. In this manner, 144 RILs, 48 RILs per condition, were assayed.

## *Genotypes and genetic map construction*

Previously, 49 lines were sequenced and aligned. The SNP calls per strain were taken for constructing the genetic map [22]. The SNP density was determined per 10kb bins and recombination events were recognized as transition of an area where there were no SNPs in 10 consecutive bins into an area where there were SNPs and the other way around. It was not allowed to have two recombination events within 10 consecutive bins (100kb). The 10kb bin where the first SNPs were detected was marked as the recombination event. Before use in mapping, the map was filtered for informative markers – that is - markers indicating a recombination event in at least one of the lines. This resulted in a map of 729 informative markers, each indicating the location of the recombination events within 20 kb (see the figure in **Additional file 2**).

The genetic map was investigated by correlation analysis, to assess the linkage between markers. Markers on the centers of the chromosomes showed strong linkage (see also, [24]). No strong in-between chromosome correlations were found (see the figure in **Additional file 3**).

## *Transcript profiling*

### *RNA isolation*

The RNA of the RIL and IL samples was isolated using the RNeasy Micro Kit from Qiagen (Hilden, Germany). The ‘Purification of Total RNA from Animal and Human Tissues’ protocol was followed, with a modified lysing procedure; frozen pellets were lysed in 150 µl RLT buffer, 295 µl RNase-free water, 800 µg/ml proteinase K and 1% β-mercaptoethanol. The suspension was incubated at 55°C at 1000 rpm in a Thermomixer (Eppendorf, Hamburg, Germany) for 30 minutes or until the sample was clear. After this step the manufacturer’s protocol was followed.

### *cDNA synthesis, labelling and hybridization*

The ‘Two-Color Microarray-Based Gene Expression Analysis; Low Input Quick Amp Labeling’ - protocol, version 6.0 from Agilent (Agilent Technologies, Santa Clara, CA, USA) was followed, starting from step 5. The *C. elegans* (V2) Gene Expression Microarray 4X44K slides, manufactured by Agilent were used. Before starting cDNA synthesis, quality and quantity of the RNA was measured

using the NanoDrop-1000 spectrophotometer (Thermo Scientific, Wilmington DE, USA) and RNA integrity was determined by agarose gel electrophoresis (3 µL of sample RNA on 1% agarose gel).

### *Data extraction and normalization*

The microarrays were scanned by an Agilent High Resolution C Scanner with the recommended settings. The data was extracted with Agilent Feature Extraction Software (version 10.5), following manufacturers' guidelines. Normalization of the data was executed in two parts, first the RILs and the ILs, second the mutant strains. For normalization "R" (version 3.3.1 x 64) with the Limma package was used. The data was not background corrected before normalization (as recommended by [25]). Within-array normalization was done with the Loess method and between-array normalization was done with the Quantile method [26]. The obtained single channel normalized intensities were log2 transformed and used for further analysis.

### *Environmental responses*

The transcriptional response to heat stress was determined by explaining the gene expression over the treatment with a linear model,

$$y_i \sim T + e_i$$

where y is the log2-normalized intensity as measured by microarray of spot i (i = 1, 2, ..., 45220) and T is the treatment (either control, heat stress, or recovery from heat stress). This analysis ignored genotype.

The significances were corrected for multiple testing by applying the Benjamini Yekutieli method in p.adjust (R, version 3.3.1 Windows x64) at FDR = 0.05 [27]. Thresholds of  $-\log_{10}(p) \geq 2.87$  for the control versus heat stress treatment,  $-\log_{10}(p) \geq 3.09$  for the control versus recovery treatment, and  $-\log_{10}(p) \geq 3.02$  for the heat stress versus recovery treatment were determined.

### *Principal component analysis*



A principal component analysis was conducted on the gene expression data of the RILs over the three treatments. For this purpose, the data was transformed to a log2 ratio with the mean, using

$$R_{i,j} = \log 2 \left( \frac{y_{i,j}}{\bar{y}_i} \right)$$

where R is the log2 relative expression of spot i (i = 1, 2, ..., 45220) in strain j (RIL) over all three conditions (n = 48 per condition) and y is the intensity (not the log2-transformed intensity) of spot i in strain j.

The transformed data was used in a principal component analysis, where the first 6 axis were further examined.

### ***Expression quantitative trait locus analysis***

#### ***eQTL mapping and threshold determination***

The eQTL mapping was done in “R” (version 3.3.1 Windows x64). The gene expression data was fitted to the linear model,

$$y_{i,j} \sim x_j + e_j$$

where y is the log2-normalized intensity as measured by microarray of spot i (i = 1, 2, ..., 45220) of RIL j. This is explained over the genotype (either CB4856 or N2) on marker location x (x = 1, 2, ..., 729) of RIL j.

The genome-wide significance threshold was determined via permutation, where the log2-normalized intensities were randomly distributed per gene over the genotypes. The randomized data was tested using the same model as for the eQTL mapping. This was repeated for 10 randomized datasets. A false discovery rate was used to determine the threshold (as recommended for multiple testing under dependency) [27],

$$\frac{FDS}{RDS} \leq \frac{m_0}{m} q \cdot \log(m)$$

where FDS is the outcome of the permutations and RDS is the outcome of the eQTL mapping at a specific significance level. The value of m<sub>0</sub>, the number of true null hypotheses tested, was 45220-RDS and for the value of m, the number of hypotheses tested, the number of spots (45220) was taken.

The q-value was set at 0.05. This yielded a threshold of  $-\log_{10}(p) > 3.9$  for the control,  $-\log_{10}(p) > 3.5$  for the heat stress, and  $-\log_{10}(p) > 3.9$  for the recovery treatment. For the analyses we used the most conservative thresholds measured,  $-\log_{10}(p) > 3.9$ , for all the sets.

### *Statistical power calculations*

In order to determine the statistical power at the set FDR threshold, QTL were simulated using the genetic map of the strains used per condition (n=48 per condition). For each marker location, 10 QTL were simulated that explained 20-80% of the variation (in increments of 5%). Random variation was introduced based on a normal distribution with  $\sigma = 1$  and  $\mu = 0$  and a peak of the corresponding size (e.g. a peak size of 1 corresponds to 20% explained variation) was simulated in this random variation. From the simulation the number of correctly detected QTL, the number of false-positives and the number of undetected QTL was counted. This was based on the thresholds determined in the permutations,  $-\log_{10}(p) > 3.9$ . Furthermore, the precision of the effect size estimation and the precision of the QTL location (based on a  $-\log_{10}(p)$  drop of 1.5 compared to the peak) were determined. A table summarizing the results can be found in **Additional file 8**.

### *eQTL analysis*

The distinction between *cis*- and *trans*-eQTL was made on the distance between the gene and the eQTL-peak. For *cis*-eQTL the gene lies within 1 Mb of the peak or within the confidence interval of the eQTL. The confidence interval was based on a  $-\log_{10}(p)$  drop of 1.5 compared to the peak.

The amount of variation explained per microarray spot with an eQTL was calculated by ANOVA, by analysis of the gene expression explained over the peak-marker. For spots with multiple peaks, this analysis was conducted per peak, not using a full model, since only a single marker model was used in the analysis.

In order to identify *trans*-bands (an enrichment of *trans*-eQTL), a Poisson-distribution of the mapped *trans*-eQTL was assumed (as in [28]). Therefore the number of *trans*-eQTL per 0.5 Mb bin were counted. Since *trans*-eQTL peaks were mapped to 107, 106, and 103 bins (respectively in control, heat stress, and recovery), it was expected that 9.16, 20.64, and 9.01 spots with a *trans*-eQTL

were to be found at each of these markers. Based on a Poisson-distribution it was calculated how many *trans*-eQTL needed to be found to represent an overrepresentation, for example, for  $p < 0.001$  there should be 20, 36, or 20 spots with a *trans*-eQTL at a specific marker (respectively in control, heat stress, and recovery).

To test for polymorphisms in genes with eQTL, we used the data from the CB4856 reference genome [22]. The genes with eQTL were matched to the polymorphisms. The frequencies of polymorphisms in each of the groups (genes with *cis*-eQTL, genes with *trans*-eQTL, and genes without eQTL) were counted and compared versus each other by a chi-squared test in R (version 3.3.1, x64).

#### *Detection of eQTL across treatments*

Two criteria were used to detect the occurrence of eQTL over multiple treatments.

In the first criterion, it was tested whether or not an eQTL was mapped in treatment 1 versus treatment 2, by simply comparing the tables listing the eQTL. This allowed for comparison of the actual mapped peaks and for comparison of eQTL effects of *trans*-eQTL regulated from different loci. In order to estimate the false discovery rate associated with this comparison, the same analysis was applied to 10 permuted datasets per condition, using the  $-\log_{10}(p) > 3.9$  for eQTL discovery.

The second criterion compared the occurrence of eQTL at the exact same marker location. In this comparison, the eQTL mapped in one treatment were taken as lead for the occurrence of the same eQTL in the other two treatments. This comparison allowed for direct comparison of the eQTL effect at the locus. Based on observations on the effect distribution, this approach was used to estimate the number of *trans*-eQTL not detected due to statistical power or not detected due to absence of the eQTL in a treatment (see also text in **Additional file 14**).

#### *Functional enrichment analysis*

Gene group enrichment analysis was done using a hypergeometric test and several databases with annotations. The databases used were: the WS220 gene class annotations, the WS256 GO-annotation, anatomy terms, phenotypes, RNAi phenotypes, developmental stage expression, and disease related

genes ([www.wormbase.org](http://www.wormbase.org)) [29]; the MODENCODE release 32 transcription factor binding sites ([www.modencode.org](http://www.modencode.org)) [30, 31], which were mapped to transcription start sites (according to [32]); and the KEGG pathway release 65.0 (Kyoto Encyclopedia of Genes and Genomes, [www.genome.jp/kegg/](http://www.genome.jp/kegg/)) [33].

Enrichments were selected based on the following criteria: size of the category  $n > 3$ , size of the overlap  $n > 2$ . The overlap was tested using a hypergeometric test, of which the p-values were corrected for multiple testing using Bonferroni correction (as provided by `p.adjust` in R, 3.3.1, x64). Enrichments were calculated based on gene-names, not on spots.

# Results

## *Transcriptional response over the course of a heat-stress*

To better understand the transcriptional response to heat stress we obtained the transcriptomes of 48 recombinant inbred lines (RILs) at the L4 stage in three treatments (control, heat stress, and recovery from heat stress,  $n = 48$  per treatment; **Figure 1A**). The effects of the treatments on gene expression levels were analyzed using a linear model (see volcano plots in **Additional file 4** and a list of affected spots in **Additional file 5**). Pairwise comparison between the treatments across all RILs revealed 7720 differentially expressed genes over the course of the three treatments as part of the whole heat stress response ( $FDR = 0.05$ ; **Figure 1B**). We found that both control and heat stress had many unique differentially expressed genes: 2321 genes were differently expressed in the control compared to the heat stress and recovery (but not between those) and 3305 genes were differently expressed in the heat stress treatment and not between control and recovery. For the recovery treatment, this were only 942 genes. Furthermore, there was also a strong overlap between genes differentially expressed in the control and heat stress treatment, compared to the recovery treatment (2251 genes). Again, the control and recovery (1152) and heat stress and recovery (1189) shared less genes. There were 1255 genes that were differentially expressed between all three conditions. These results indicate that the control and heat stress treatments are strongly contrasting in gene expression, whereas the recovery treatment shares characteristics with both other treatments.

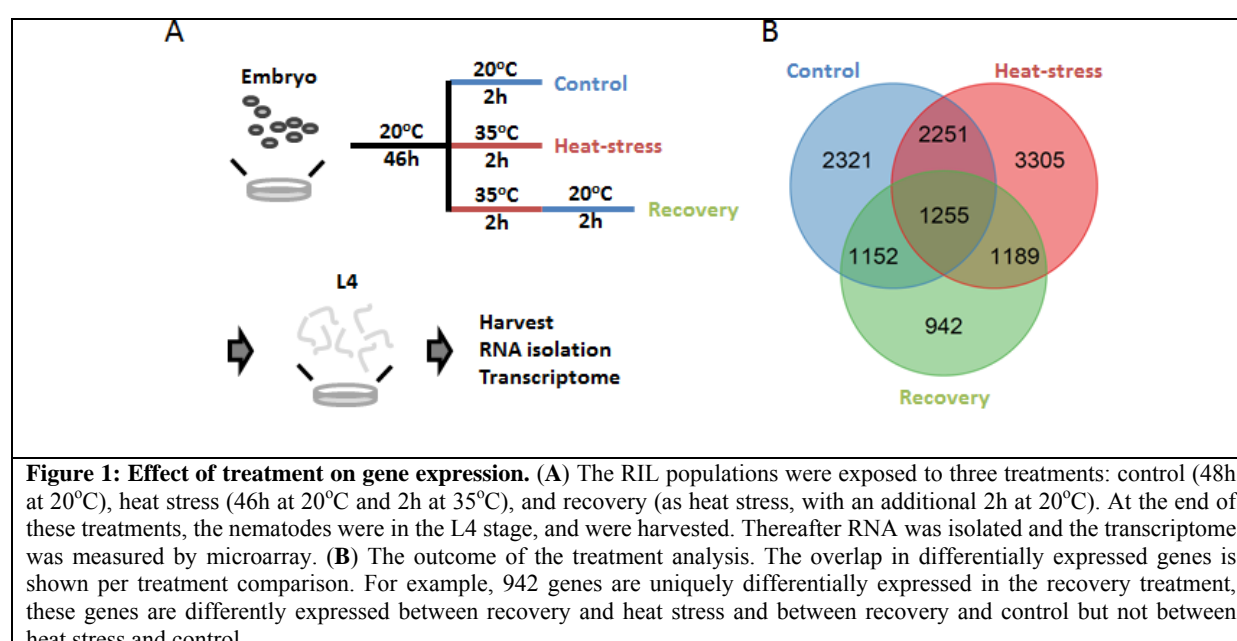

To follow up on this interpretation, a principal component analysis (PCA) was conducted on the gene expression data, transformed to the log2 ratio with the mean. The second axis (11.4% of the variation) placed the recovery treatment in-between the control and heat stress treatment (**Additional file 6**), showing the contrast with the other two treatments was lower and transcript levels are returning to normal. The third principal component (10.1% of the variation) separated the heat stress treatment from the other two treatments as expected since the heat stress treatment has the most unique differentially expressed genes.

In order to gain further insight into the functional differences between the treatments, an enrichment analysis was conducted on genes belonging to the different – overlapping – groups as shown in **Figure 1** (For example genes differentially expressed in only the control treatment, see the list in **Additional file 7**). Each of the groups was enriched for many processes, showing that the treatments had a profound impact on gene expression. Interestingly, we found that genes specific for each of the three treatments were enriched for genes expressed in the intestine. Furthermore, the control and heat stress treatments were strongly enriched for genes expressed in the germline. These enrichments indicated that the expression of genes involved in metabolism and reproduction (or development of the reproductive organs) were strongly altered during the heat stress response.

### *Gene expression linked to genetic variation*

Linkage mapping was performed using 48 RILs for each of the three treatments. Statistical power analysis showed that this population has the power to detect 80% of the eQTL that explain at least 35% of the variation (see Materials and methods and the table in **Additional file 8**). Identified eQTL ( $FDR \leq 0.05$ ; **Figure 2**; a table with all eQTL is given in **Additional file 9**) were compared between the treatments (**Table 1**). Most genes with an eQTL were found in the heat stress treatment (2626), whereas the control (1797) and recovery (1880) had similar numbers. This increase in genes with eQTL was primarily caused by the larger number of genes with *trans*-eQTL in the heat stress treatment (1560; ~57% of total eQTL) compared to the control (751; ~40% of total) and recovery (739; ~38% of total). The number of *cis*-eQTL was almost identical between conditions (**Table 1**).

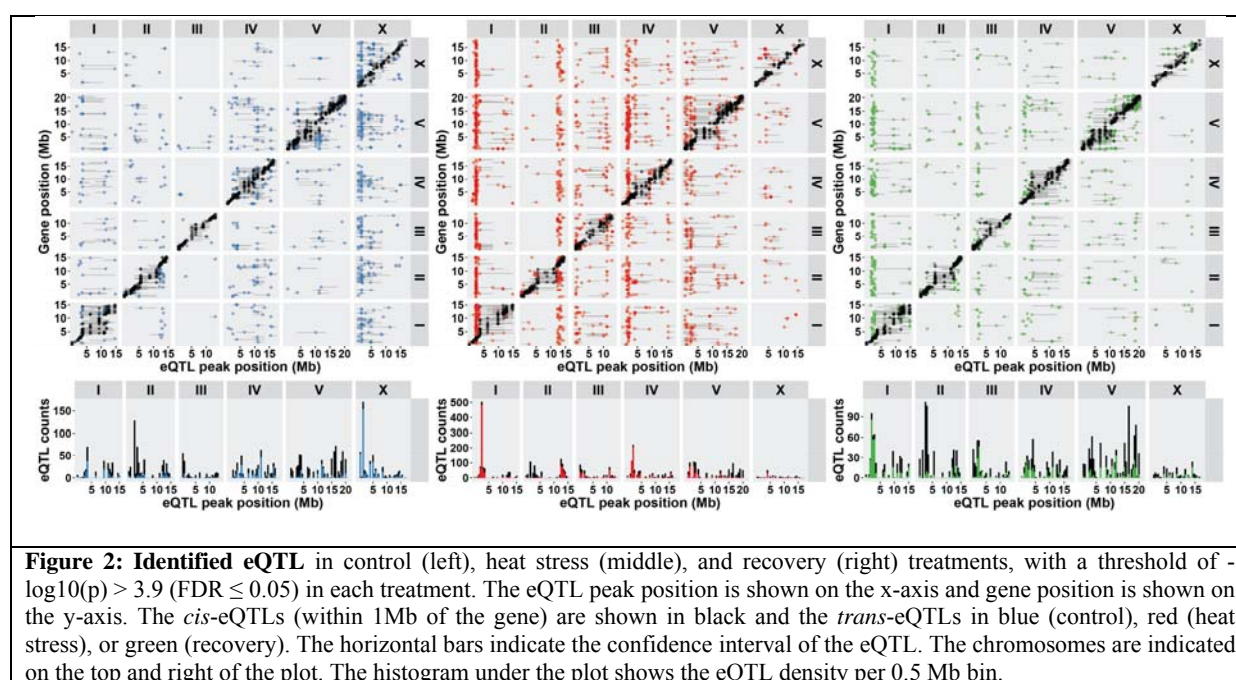

**Figure 2: Identified eQTL in control (left), heat stress (middle), and recovery (right) treatments, with a threshold of  $-\log_{10}(p) > 3.9$  ( $FDR \leq 0.05$ ) in each treatment. The eQTL peak position is shown on the x-axis and gene position is shown on the y-axis. The *cis*-eQTLs (within 1Mb of the gene) are shown in black and the *trans*-eQTLs in blue (control), red (heat stress), or green (recovery). The horizontal bars indicate the confidence interval of the eQTL. The chromosomes are indicated on the top and right of the plot. The histogram under the plot shows the eQTL density per 0.5 Mb bin.**

| <b>Table 1: Number of genes with an eQTL</b> |                |                    |                 |
|----------------------------------------------|----------------|--------------------|-----------------|
|                                              | <b>Control</b> | <b>Heat stress</b> | <b>Recovery</b> |
| <i>cis</i> -eQTL <sup>1</sup>                | 1138           | 1186               | 1215            |
| N2 higher                                    | 809 (71.1%)    | 802 (67.6%)        | 883 (72.7%)     |
| CB4856 higher                                | 329 (29.9%)    | 384 (32.4%)        | 332 (27.3%)     |
| <i>trans</i> -eQTL                           | 751            | 1560               | 739             |
| N2 higher                                    | 300 (39.9%)    | 583 (37.4%)        | 393 (53.2%)     |
| CB4856 higher                                | 451 (60.1%)    | 977 (62.6%)        | 346 (46.8%)     |
| Total <sup>2</sup>                           | 1797           | 2626               | 1880            |

<sup>1</sup>: *cis*-eQTL were called if the QTL peak lies within 1 Mb of the affected gene, or if the affected gene lies within the 1.5 LOD-drop confidence interval.  
<sup>2</sup>: The differences between the total and the summation of the individual *cis*- and *trans*-eQTL is due to genes with both a *cis*- and *trans*-eQTL.

The *cis*-eQTL showed a bias for higher expression if the regulatory locus had the N2 allele; on average 70% of the genes with a *cis*-eQTL. This bias was absent in the *trans*-eQTL, where on average 43% of the genes with a *trans*-eQTL was higher expressed if the locus had the N2 allele (illustrated by the figure in **Additional file 10**). This discrepancy was to be expected, since the microarray platform used to measure the transcripts was designed for the N2 genotype. Therefore, part of this variation is likely due to mis-hybridization. However, previous studies have shown that this does not explain all the variation (see [28]). In congruency, we found genes with a *cis*-eQTL to be more polymorphic than genes with a *trans*-eQTL and genes without an eQTL (summarized in **Additional file 11**). For example, genes with a *cis*-eQTL were more likely to be fully deleted in CB4856 (9.5% of the genes,



compared to 0.9% in genes without an eQTL or 1.1% in genes with a *trans*-eQTL; Chi-squared test,  $P < 1 \times 10^{-34}$ ). Furthermore, supporting that not all *cis*-eQTL stem from mis-hybridization, polymorphisms in the flanking 3' and 5' regions were ~2 times more likely to occur near *cis*-eQTL compared to genes without a *cis*-eQTL (Chi-squared test,  $P < 1 \times 10^{-6}$ ).

The *trans*-eQTL were mainly found in 19 treatment specific *trans*-bands; loci that regulate the abundance of many transcripts. The 19 *trans*-bands were identified by analysis of the occurrence of *trans*-eQTL across the genome (Poisson distribution,  $P < 0.001$ ; listed in **Additional file 12**). The 7 *trans*-bands detected in the heat-stress treatment contained most genes (1141; ~73% of all *trans*-eQTL). In the control treatment, 5 *trans*-bands were found (325 genes; ~43% of all *trans*-eQTL) and in recovery treatment 7 *trans*-bands were identified (343 genes; ~46% of all *trans*-eQTL). Six out of the 19 *trans*-bands individually affected >100 genes. One located at chromosome X: 0.5-2.0 Mb in control treatment; four in heat stress treatment at chromosome I: 2.0-3.5 Mb, II: 12.0-13.5 Mb, IV: 1.0-2.5 Mb, and V: 1.0-3.0 Mb; and one in recovery treatment at chromosome I: 1.5-3.0 Mb. Importantly, the distribution across the genome of *trans*-bands and eQTL is treatment specific. To further investigate this, we determined the overlap in mapped eQTL over the course of the heat stress response.

*In contrast to cis-eQTL, trans-eQTL were environment specific*

Comparing the genes with a *cis*-eQTL between the three treatments we found 1086 out of 1789 unique genes (~61%) with a *cis*-eQTL in more than one treatment and 664 (~37%) in all three treatments (**Figure 3A**). This was much less for genes with a *trans*-eQTL (**Figure 3B**) as 360 out of 2610 genes (~14%) were found in more than one treatment and only 80 genes (~3%) in all three treatments. By definition, the locus at which *cis*-eQTL were detected was the same between treatments. Furthermore, the *cis*-eQTL effect sizes and direction were highly comparable (Pearson correlation coefficients between 0.94-0.96; shown in a figure in **Additional file 13**). The *cis*-eQTL that were detected in only one treatment, were probably missed due to the small amount of variation explained by these eQTL (see the text in **Additional file 14**). Interestingly, there were only three genes with *cis*-eQTL showing



genotypic plasticity: C52E2.4, C54D10.9, and *nhr-226*. This meant that we observed allelic variation acting in opposite directions between environments (**Figure 3C**).

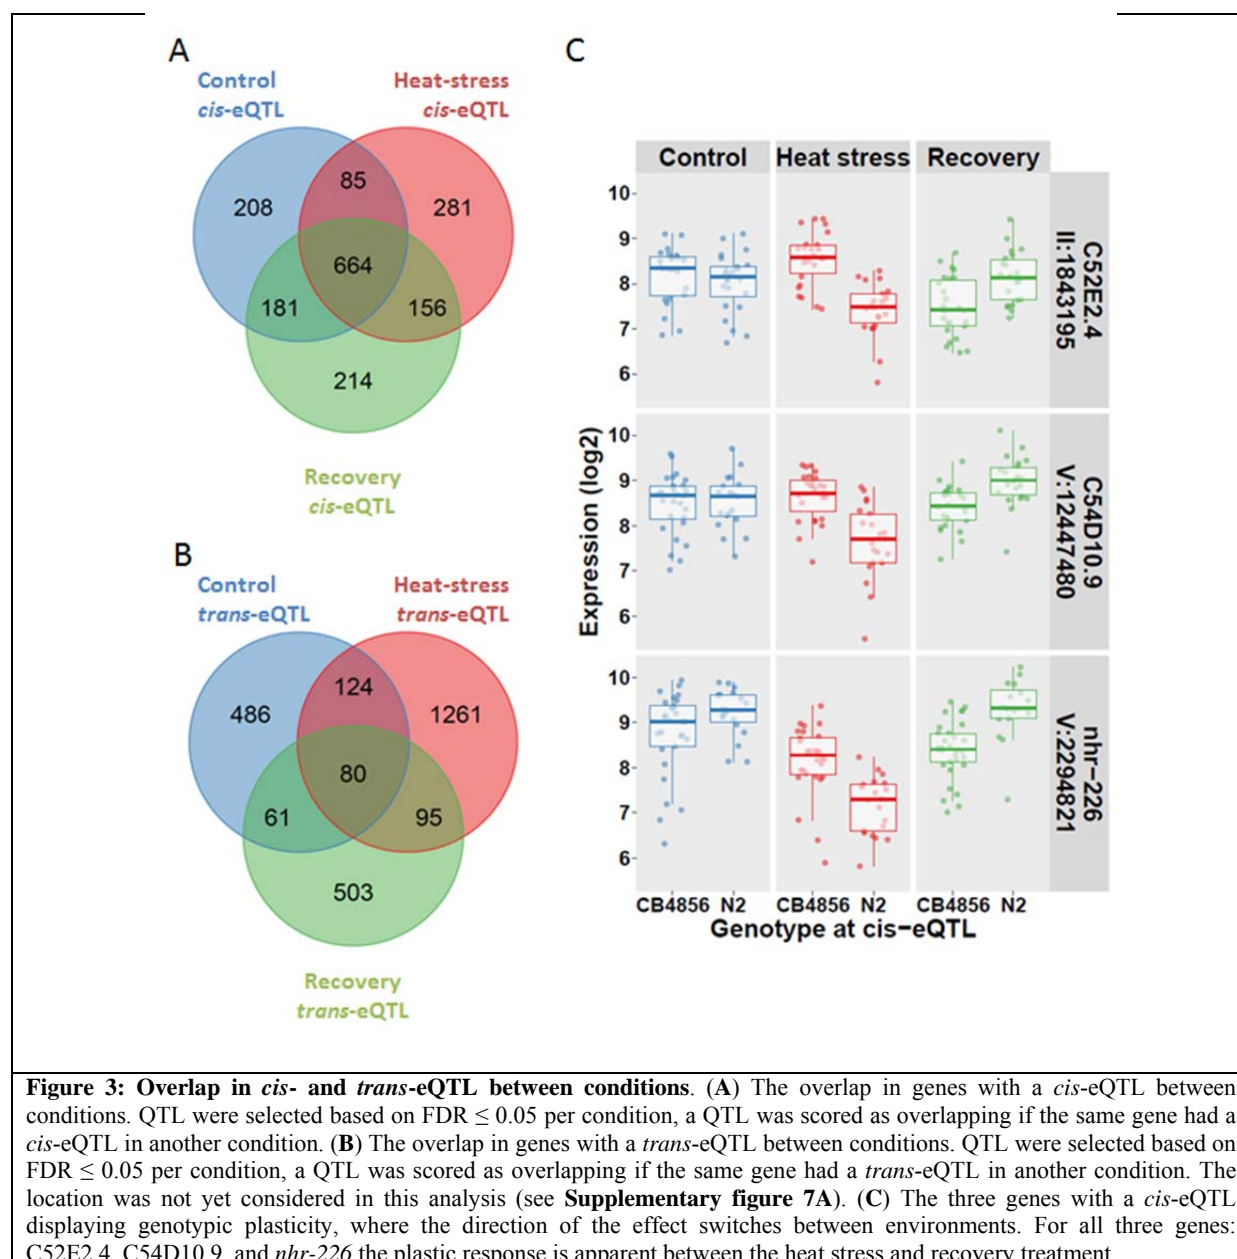

The effect sizes and direction of genes with a *trans*-eQTL found in more than one treatment were very similar (Pearson correlation coefficients between 0.90-0.93; figure in **Additional file 13**). Yet, only a minority of the genes with a *trans*-eQTL was found over multiple treatments, far lower than the overlap in *cis*-eQTL between conditions (**Figure 3A** and **B**). Since *trans*-eQTL are not per definition regulated from the same location, the overlap between treatments declines even further if location is taken into account. Taking the *trans*-eQTL from the three treatments together only ~38% of

the multi-treatment *trans*-eQTL were located at a different locus from one treatment to another (~28% if only loci at different chromosomes were counted), see **Additional file 15** (figure A). Interestingly, although the regulatory locus was located elsewhere, the genotypic effect of the *trans*-eQTL was almost identical (**Additional file 15**, figure B). Yet, most genes with *trans*-eQTL, only displayed an eQTL in one treatment (text in **Additional file 14**). The likely reason that the majority of *trans*-eQTL was not detected across treatments is that most *trans*-eQTL are environment specific and therefore highly cryptic.

# *Trans-eQTL display two types of cryptic variation*

For treatment specific, cryptic, *trans*-eQTL we found that a regulator is active when the eQTL is detected and when no eQTL is detected it is not active. With on and off switching regulators between treatments, genes can have dynamic *trans*-eQTL, which appear as a treatment specific switch of regulatory loci (**Figure 3 - 5**). Since the majority of genes with a *trans*-eQTL have one unique *trans*-eQTL in only one treatment (**Figure 3B**), a switch in regulatory loci seems to occur less frequent.

As the majority of the *trans*-eQTL was treatment specific, we investigated whether detection in only one treatment was a result of the statistical power of our study or if it was a biological phenomenon. As *trans*-eQTL explain 34.2% of variation on average, compared to 52.1% of variation for *cis*-eQTL (text in **Additional file 14**), it is possible that the detection of *trans*-eQTL was more affected by lack of statistical power. By simulations we estimated that this only affected 20.6% of the *trans*-eQTL that were not detected in multiple treatments (for the detailed analysis see the text in **Additional file 14**), which argues for the cryptic nature of *trans*-eQTL. Another line of evidence for this is the low overlap in affected genes in co-locating *trans*-bands across treatments (13/19 *trans*-bands co-locate). We only found significant overlap in 3 pairs of *trans*-bands, where 6.5-11.1% of the affected genes overlap (text in **Additional file 14**; hypergeometric test  $p < 1 \cdot 10^{-4}$ ). For example, one of these, a major *trans*-band at chromosome IV:1-2.5 Mb in the heat stress treatment *t* affected 244 genes of which 22 overlapped with of the 31 genes in the recovery *trans*-band on chromosome IV:1-2 Mb. Together, these results show that the majority (67.3%) of *trans*-eQTL indeed are cryptic. For

example, the transcript levels of *flp-22*, *pqm-1*, and *sod-5* were affected by treatment (**Figure 4A**), and showed a *trans*-eQTL in only one treatment (**Figure 4B**).

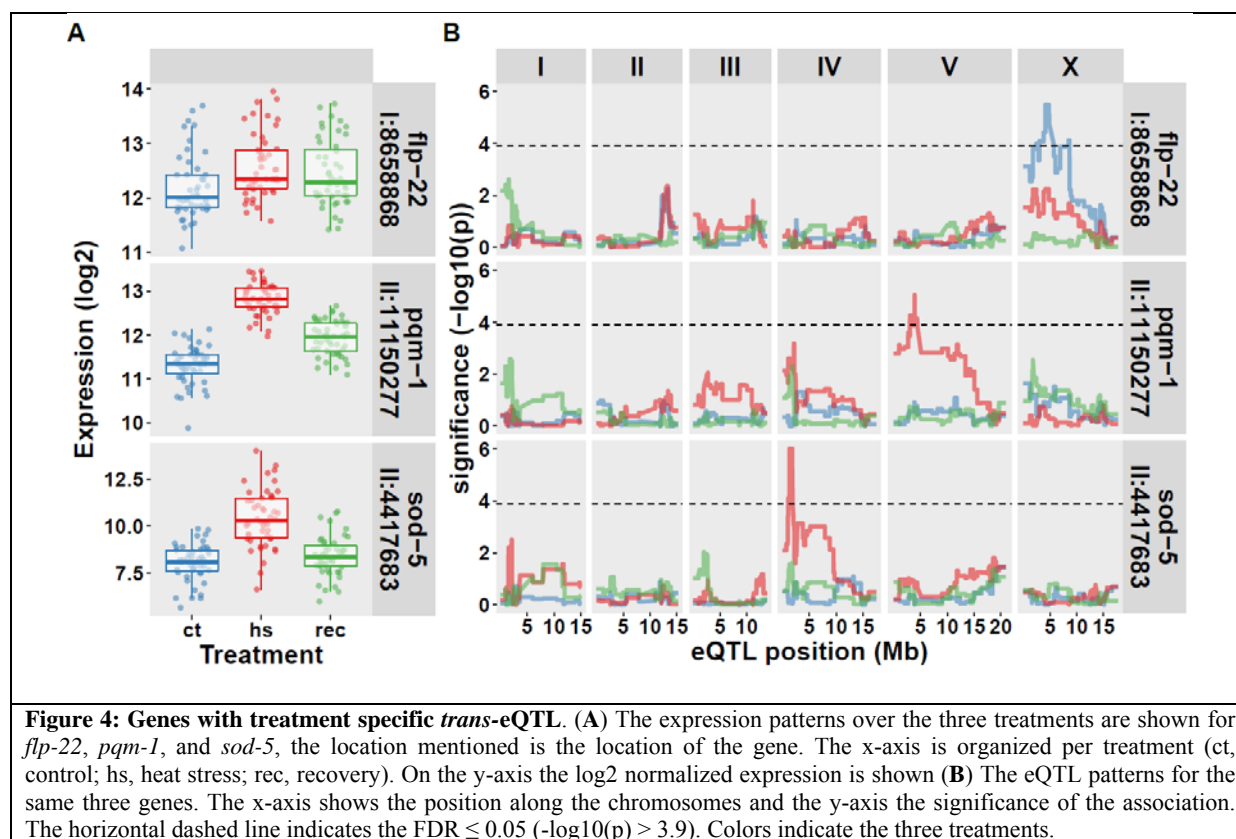

As mentioned before, only a minority of the genes with a *trans*-eQTL have different eQTL across treatments. Of those genes with different *trans*-eQTL over treatments, the genotypic effects of the eQTL were similar across treatments, even if the loci were different (**Additional file 15**, figure B). Only between chromosome IV and V eQTL with anti-correlated effects were observed. One of the genes displaying this pattern was *gei-7* (also known as *icl-1*). This gene was represented by 3 different micro-array probes, all showing the same pattern: a primary eQTL on chromosome V at ~12.0Mb in all three conditions and a secondary eQTL in the heat stress treatment at chromosome IV at ~1.5Mb (**Figure 5**).

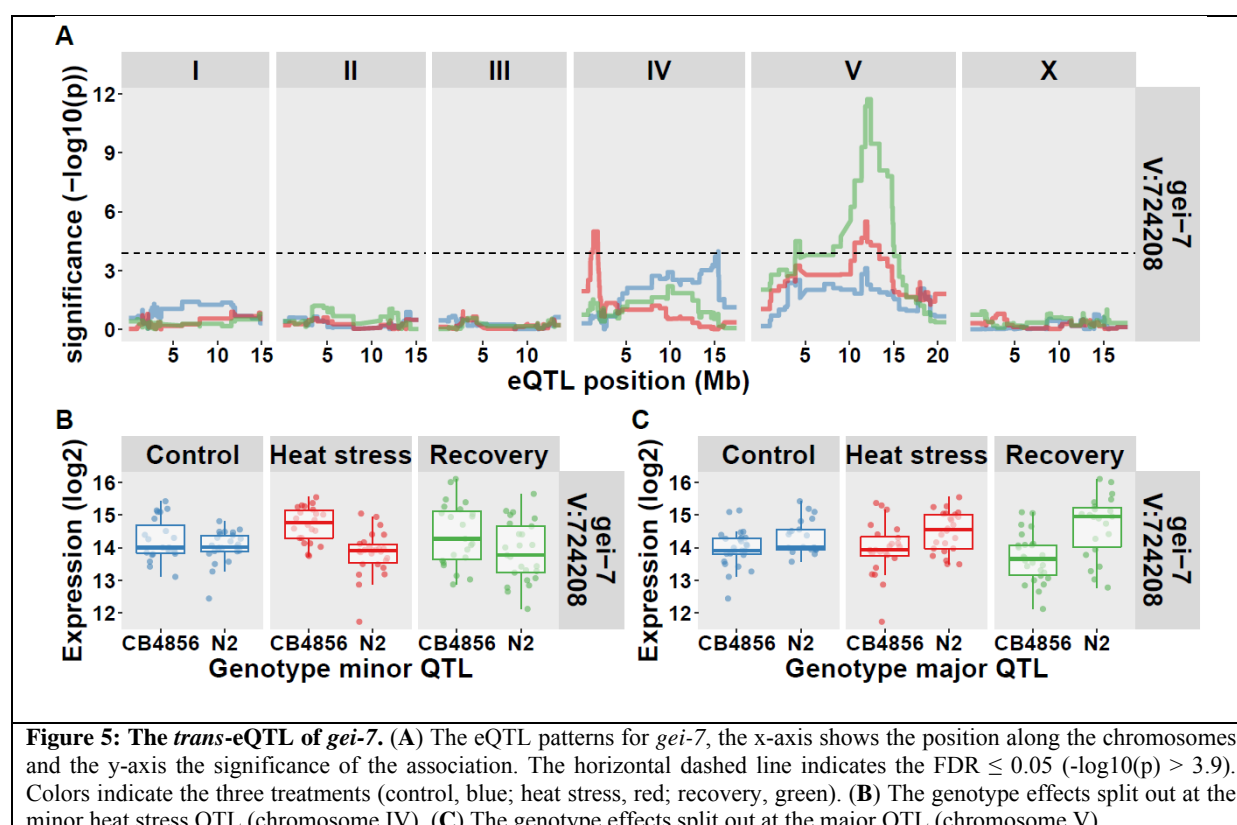

**Figure 5: The *trans*-eQTL of *gei-7*.** (A) The eQTL patterns for *gei-7*, the x-axis shows the position along the chromosomes and the y-axis the significance of the association. The horizontal dashed line indicates the FDR  $\leq 0.05$  ( $-\log_{10}(p) > 3.9$ ). Colors indicate the three treatments (control, blue; heat stress, red; recovery, green). (B) The genotype effects split out at the minor heat stress QTL (chromosome IV). (C) The genotype effects split out at the major QTL (chromosome V).

# Functional enrichment of eQTL

To find which biological processes were affected by genetic variation on a gene expression level we looked for enrichment in gene classes, phenotypes, KEGG pathway, GO terms, and anatomy terms (see the list in **Additional file 16**). For *cis*-eQTL enriched categories were similar in all three treatments, as expected by the consistent nature of *cis*-eQTL. For *cis*-eQTL we found enrichments for the gene classes, *bath*, *math*, *btb*, and *fbxa* which were previously found to be highly polymorphic between CB4856 and N2 [22]. Moreover, we found enrichment for genes involved in the innate immune response and protein homooligomerization.

The *trans*-eQTL were also enriched for genes functioning in the innate immune response, especially for genes where the N2 allele leads to higher expression. Furthermore, genes expressed in the intestine were enriched in the *trans*-eQTL found in control and heat stress conditions. Contrasting to the genes with *cis*-eQTL, the genes with *trans*-eQTL were enriched for many different transcription factor binding sites, indicating active regulation of *trans*-eQTL.

Consistent *trans*-eQTL were found in all three treatments for the enriched NSPC (nematode specific peptide family, group C) gene class. This was remarkable as only a very small part of the

*trans*-eQTL were shared over the three treatments. For the heat stress and recovery *trans*-eQTL, genes expressed in the dopaminergic neuron were enriched, with the strongest enrichment in the heat stress treatment. These genes were also enriched in the control treatment, however, in a group of *trans*-eQTL mapping to a different trans-band. In the heat stress and recovery treatment the dopaminergic neuron specific genes showed *trans*-eQTL at the IV:1-2MB locus whereas in the control they showed *trans*-eQTL at the X:4-6 locus (**Figure 6**).

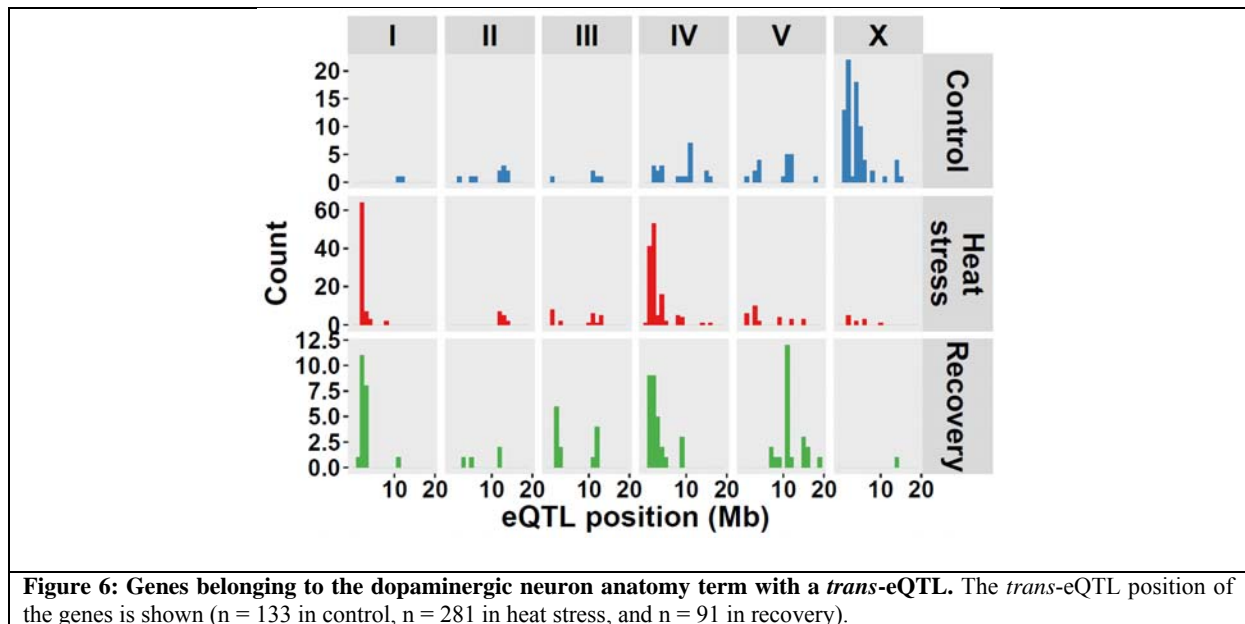

## Discussion

### Transcriptional response over the course of a heat stress

Here we present a comprehensive study of the effects of an induced heat stress treatment on the genetic architecture of gene expression. The obtained transcriptomes were analyzed in the context of the treatments and in the context of the genetic variation present in the strains used in the experiments.

We found that many of the genes that are affected over the heat stress course are associated with expression in the germline and intestine. These findings are partially in line with findings from an investigation on the heat shock regulatory network using a genome wide RNAi screen in *C. elegans* [5]. Their heat stress conditions were 31.5°C for two hours followed by 24 hours of recovery at 20°C. The authors found that genes associated with the proteasome induced heat stress specific gene expression only in the intestine and spermatheca which corroborates with our results. Differences with Guisbert *et al.* (2013), could be explained by the differences in larval stage used (L4 vs L2) as well as differences in temperature and duration of the heat stress (and recovery). Another study exposed *C. elegans* at the L4 stage to a heat stress of 30 min at 33°C, and measured transcriptome differences using RNA-seq [34]. In support of our study they also detected genes associated with metabolism and reproduction whereas - in contrast to our findings - they found a strong link with cuticle specific genes. This contrast could be due to the different experimental conditions of Bunquell *et al.* 2016 as they used RNAi treatments (empty vector or against *hsf-1*), a different heat shock duration, method of synchronization (additional L1 arrest by [34]), and rearing temperature before heat shock (23°C versus 20°C in this study).

We hypothesize that ultimately these discrepancies are likely to result from developmental differences. The transcriptional program in *C. elegans* differs strongly over development [8, 9]. Therefore, application of a heat shock on L2 larvae has a very different developmental (and therefore transcriptional) starting point compared to a heat shock applied on L4 larvae. Furthermore, within the L4 stage there is a strong difference in gene expression in early stage L4 and late stage L4. The main processes that affects transcription in this stage are reproduction and development [9]. These are exactly the processes that are halted upon induction of a heat shock [5, 34]. Therefore, it is likely that

the state in which these processes are strongly affects the possible routes for down regulation. It would therefore be very interesting to study the effect of heat shock in relation to the developmental dynamics.

# **In contrast to *trans*-eQTL, *cis*-eQTL are directly linked to polymorphisms**

The *cis*-eQTL over the three treatments - which strongly overlapped – are strongly enriched for polymorphic genes. This has been reported before in *C. elegans*, but also in *A. thaliana*, *Mus musculus*, and for human *cis*-eQTL [12, 28, 35-38]. This can result in the detection of transcriptional variation that is actually caused by hybridization differences [28, 38]. By analysis of the bias in *cis*-eQTL with higher expression in N2 (the strain for which the microarray was developed) versus CB4856 indeed shows that a proportion of the *cis*-eQTL is likely to stem from hybridization differences. This was also apparent from the gene enrichment analysis, was *cis*-eQTL were overrepresented for polymorphic gene classes such as *bath*, *math*, *btb*, and *fbxa*, which are also divergent among other wild strains [39, 40]. Other experimental methods could limit such ‘false positives’, for example, RNA sequencing is expected not to suffer from such biases [41].

Interestingly, genes with a *cis*-eQTL were also strongly enriched for polymorphisms in regulatory regions. For these *cis*-eQTL it could be true that the expression is affected by transcription factor (TF) binding sites [42], yet we did not detect any enrichment for such sites as mapped by ModEncode [30, 31]. An explanation for this is that the affected TF binding site is different per gene with a *cis*-eQTL and an overrepresentation among all *cis*-eQTL is therefore unlikely.

# **CGV of transcriptional architecture is determined by *trans*-eQTL**

Although previous studies in *C. elegans* have focused on continuous (thermal or developmental) treatments or gradual change over time [12, 15, 43], only few genetical genomics experiments have measured the effect of direct perturbation, where an organism is suddenly exposed to a different environment [44]. This directly affected the transcriptional architecture of gene expression which consists of *cis*- and *trans*- acting eQTL. We found that *cis*-eQTL were robust in all three treatments, including heat stress. Which was found before in studies on *C. elegans* and other species where eQTL



patterns have been studied in different conditions. For example, Li *et al.* (2006) found that more than 50% of all *trans*-eQTL were affected by temperature compared to *cis*-eQTL [12], and Smith and Kruglyak (2008) also reported that *cis*-eQTLs were hardly affected by external conditions as compared to *trans*-eQTL [45]. Also in other species, like *Arabidopsis thaliana*, it was reported that *cis*-eQTL were robust to perturbation where *trans*-eQTL were more affected by different light regimes than *cis*-eQTL [37]. In humans, *cis*-eQTL showed a very low correlation between tissues compared to *trans*-eQTL, and are replicated across populations in lymphoblastoid cell lines [46, 47].

By inducing a strong environmental perturbation in the form of a heat shock, a high amount of different *trans*-eQTL were detected across the control, heat stress, and recovery treatment. One of the things we noted is the increase in the number of *trans*-eQTL and *trans*-bands in the heat stress treatment compared to the other two treatments. This strong transcriptional variation could underlie – or result from – the trait differences observed between N2 and CB4856 in temperature experiments. Temperature affected trait differences have been observed for: age at maturity, fertility, body size, vulval induction, and lifespan [19, 48-51]. Furthermore, these strains also display behavioural differences in heat avoidance and thermal preference [20, 21]. Likely candidates for these trait differences could be found in loci affecting the expression of many *trans*-eQTL. For example, the left arm of chromosome IV harbours a *trans*-band affecting the expression of 244 genes and coincides with a QTL affecting lifespan after heat shock [19]. Analogous, the laboratory allele of *npr-1* affects many trait differences between N2 and CB4856 (as reviewed in [52]). Most importantly, *npr-1* affects the behaviour of the animal, which ultimately results in gene expression differences [53]. These gene expression differences can be picked up as a *trans*-band [28]. The latter example illustrates both a link between gene expression and classical traits and that caution is required for inferring the direction of causality.

Why is CGV mainly affecting *trans*-eQTL? We hypothesize that this is due to the versatile nature of *trans*-eQTL. First, *trans*-eQTL are loci that are statistically associated with variation in transcript abundance from genes elsewhere on the genome. The ultimate causes for this association can be manifold, from direct interactions such as polymorphic transcription factors that affect gene expression to indirect interactions such as receptor kinase interactions [44], receptors [44, 53, 54], or



effects at the behavioural level that result in expression differences [53]. Therefore, a specific environment can require the organism to respond, thereby requiring specific polymorphic genes to react, ultimately leading to the expression of cryptic variation.

# **The *trans*-eQTL architecture is comprised of treatment specific genes**

The *trans*-eQTL architecture is remarkably unique over the three treatments tested. We only observed 3% overlap in *trans*-eQTL in the three treatments, for which the main cause was treatment specificity of *trans*-eQTL. Surprisingly, genetic variation affects the expression of genes in only one direction; only in rare cases does allelic variation change the sign of the effect and this was only observed for *cis*-eQTL (C52E2.4, C54D10.9, and *nhr-226*). On the one hand, this is in congruency with other eQTL studies comparing different environments; *trans*-eQTL are strongly affected by different environments (for example, see [12, 37, 45]). On the other hand, it raises questions about the genetic architecture of *trans*-bands; co-localizing *trans*-bands are generally not the same (see text in **Additional file 14**), which can imply the involvement of multiple regulators (causal genes).

However, it seems unlikely that an abundance of novel *trans*-eQTL also implies an abundance of novel causal genes. First of all, over all three treatments the majority of *trans*-eQTL are located in *trans*-bands, which are mostly non-overlapping between treatments. This is an observation that extends to other studies and other species in which eQTL have been mapped: the majority of *trans*-eQTL are found on a few regulatory hotspots (for example, see [28, 36, 55]). Therefore, it is logical to assume that a small set of causal genes ultimately explains the majority of *trans*-eQTL. Second, the allelic effect only has one direction, which is easily aligned with the notion of a few regulators instead of many. Together, these observations can help in further dissecting loci to identify causal genes. *Trans*-band regulators might play a role in the dynamic response, which could aid in narrowing down candidate genes.

However, it should be reiterated that the route from genetic variation resulting in transcriptional effect can be manifold, which can also obscure the ultimate cause of the observed trait variation. An organism is an intricate web of interdependencies leading to the phenotype. Therefore, upon further dissection of the loci, a single eQTL might prove to be many. Furthermore, it should be

532 noted that *trans*-eQTL explain less variation compared to *cis*-eQTL, which has been established across  
533 species [28, 56]. Therefore, it is more likely that *trans*-eQTL are not detected. However, the treatment  
534 specificity and direction of allelic effects of *trans*-eQTL across three treatments robustly show *trans*-  
535 eQTL architecture is comprised of treatment specific genes.

## Conclusion

Here we present the contribution of CGV on eQTL across three treatments in the nematode *C. elegans*. We find that mainly *trans*-eQTL are affected by CGV, in contrast to *cis*-eQTL which are highly similar across treatments. Furthermore, we show that most CGV results in unique genes with a *trans*-eQTL, instead of different allelic effects and/or different eQTL for the same genes. This shows the highly dynamic nature of CGV.

## Availability of data and materials

All strains used can be requested from the authors. The transcriptome datasets generated and the mapped eQTL profiles can be interactively accessed via (<http://www.bioinformatics.nl/EleQTL>).

## Author contributions

LBS and JK conceived and designed the experiments. MGS, RPJB, RJMV, JAGR, and RB conducted the experiments. AVH, RB conducted the sequencing of the strains. LBS, MGS, and RPJB conducted transcriptome and main analyses. LBS, MGS, and JEK wrote the manuscript. RPJB, RJMV, and AC provided comments on the manuscript.

## Acknowledgements

The authors are grateful for the discussions and support from the GRAPPLE project partners: Olga Valba, Sreenival Chavali, Benjamin Lang, Mirko Francesconi, Sergei Nechaev, Olga Vasieva, M. Madan Babu, and Ben Lehner. We are also grateful for Katharina Jovic and Lisa van Sluijs for feedback on the manuscript. We also want to thank Harm Nijveen for making our data available in EleQTL. LBS was funded by ERASysbio-plus ZonMW project GRAPPLE - Iterative modelling of gene regulatory interactions underlying stress, disease and ageing in *C. elegans* (project 90201066) and The Netherlands Organization for Scientific Research (project no. 823.01.001).

## Additional files

**Additional file 1: Strains and genotypes.** Matrix with the strain names and genotypes of the recombinant inbred lines used in this study. The genotypes are based on genome sequencing (see Materials and Methods).

**Additional file 2: A figure of the location of the 729 markers.** The marker locations are plotted across the genome. Locations are based on WS256.

**Additional file 3: A figure of the marker correlation analysis.** Correlations between the 729 markers in the sequenced RIL population. The markers are plotted at their physical locations across the chromosomes.

**Additional file 4: Figure of the treatment comparisons.** Volcano plots of the expression comparisons per treatment ( $n = 48$  RILs per treatment). The horizontal line in the plots indicates the  $FDR = 0.05$  threshold. The colored dots indicate spots that are significantly different between treatments. Blue indicates spots higher expressed in the control treatment, red indicates spots higher expressed in the heat stress treatment, and green indicates spots higher expressed in the recovery treatment. **(A).** The comparison between control and heat stress, threshold:  $-\log_{10}(p) \geq 2.87$ . **(B).** The comparison between control and recovery, threshold:  $-\log_{10}(p) \geq 3.09$ . **(C).** The comparison between heat stress and recovery, threshold:  $-\log_{10}(p) \geq 3.02$ .

**Additional file 5: Table of treatment comparison results.** A table with the spots that are significantly different between treatments. The spot number is given, the comparison in which the spot was different is given, and the characteristics of the difference (significance and effect). Also information about the gene represented by the spot is shown (WormBase identifier, sequence name, public name, and the location on the genome). The last column indicates to which group the spot belongs (*e.g.* specific for heat stress treatment, or significantly different between all three treatments).

**Additional file 6: Figure of the principal component analysis.** The first six axes of the principal component analysis are shown, plotted against each other. The axis capturing most variation (PC1), captures 20% and the sixth axis captures 4.7%. The dots represent individual samples ( $n = 48$  RILs per treatment) and are colored according to treatment: blue for control, red for heat stress, and green for recovery. The first axis separates the heat stress treatment from the control and recovery treatment, but also captures some technical variation. The second axis (11.4%) places the recovery treatment in-between the other two treatments.

**Additional file 7: A list of the enrichment analysis treatment responsive genes.** Enrichment analysis on the genes with transcriptional responses by heat stress. The database used for enrichment (Annotation) and the category (Group), and the number of genes on the array that are in the group (Genes\_in\_group) are also indicated. Furthermore, the overlap with the cluster (Overlap) and the Bonferroni-corrected significance of that overlap are shown.

**Additional file 8: Table summarizing the statistical power calculations.** Outcome of the statistical power calculations conducted for the RIL population of each treatment ( $n = 48$  RILs per treatment). The outcomes are ordered per treatment population, and per simulated QTL peak size. All peaks were simulated in random variation generated by a standard normal distribution. The simulation reports on (i) QTL detection, *e.g.* how many of the simulated QTL were detected, how many false QTL were reported; (ii) QTL effect size estimation, mapped effect/simulated effect (reported in quantiles); (iii) QTL location estimation, [mapped location – simulated location].

**Additional file 9: Table of the mapped eQTL in the control, heat stress, and recovery treatment.** The eQTL are given per trait (Spot) and treatment. The QTL type, location and confidence interval is listed, as is the significance and effect. The effect is higher in N2 (positive numbers) or higher in

CB4856 (negative numbers) loci. Furthermore, information about the affected gene represented by the microarray spot is shown (name, and location).

**Additional file 10: Figure of eQTL effect distribution.** (A) Volcano plots of the eQTL mapped per type (*cis* or *trans*) per treatment. On the x-axis the effect is plotted and on the y-axis the significance of the association is plotted ( $-\log_{10}(p)$ ). Each dot represents a microarray spot and only the significant associations are shown ( $FDR \leq 0.05$ ,  $-\log_{10}(p) > 3.9$  in all three treatments). (B) A histogram of the eQTL effect sizes, per type (*cis* or *trans*) per treatment. Again, the number of significantly associated spots are counted.

**Additional file 11: Table listing polymorphisms in eQTL.** The polymorphism between and CB4856 and N2 were taken from Thompson *et al.*, 2015 and counted in the genes with *cis*-, *trans*-, or no eQTL. The occurrences of polymorphic genes in the three sets were compared by a chi-squared test.

**Additional file 12: A list of *trans*-bands.** This table lists the identified *trans*-bands per treatment. The number of affected genes and the number of spots with a *trans*-eQTL these genes were represented by are shown.

**Additional file 13: Figure comparing allelic effects of genes with an eQTL between treatments.** A scatter plot of the effects of the eQTL of genes with an eQTL found in multiple treatments. Each dot represents a spot. The Pearson correlation values between the different comparisons are:  $R=0.94$  and  $0.91$  for *cis*- and *trans*-eQTL in control versus heat stress,  $R=0.96$  and  $0.93$  for *cis*- and *trans*-eQTL in control versus recovery, and  $R=0.94$  and  $0.89$  for *cis*- and *trans*-eQTL in heat stress versus recovery. The striped diagonal lines are shown as an optical reference.

**Additional file 14: Text detailing the calculations on overlap in *cis*- and *trans*-eQTL.**

**Additional file 15: Figure comparing genes with a *trans*-eQTL in different treatments.** (A). A plot of the eQTL location in treatment 1 versus the eQTL-location in treatment 2. Treatment 1 is the first treatment listed in the legend, for example: the magenta dots represent eQTL where the first treatment is control and the second treatment is heat stress. The grey lines represent the confidence interval of the eQTL based on a 1.5 drop in  $-\log_{10}(p)$ . The diagonal band in this plot represents *trans*-eQTL that are regulated from the same location across treatments. (B) The eQTL effects of the *trans*-eQTL shown in (A), ordered per chromosome. The striped diagonal lines are shown as an optical reference.

**Additional file 16: A list of the enrichment analysis of genes with an eQTL.** Enrichment analysis on the genes with eQTL across different conditions. The sets were also analyzed for genes with an eQTL with a specific allelic effect, belonging to a specific *trans*-band and found, and belonging to a specific treatment. The database used for enrichment (Annotation) and the category (Group), and the number of genes on the array that are in the group (Genes\_in\_group) are indicated. Furthermore, the overlap with the cluster (Overlap) and the Bonferroni-corrected significance of that overlap are shown.

# References

1. Grishkevich V, Yanai I: **The genomic determinants of genotype x environment interactions in gene expression.** *Trends in genetics : TIG* 2013, **29**(8):479-487.
2. GuhaThakurta D, Palomar L, Stormo GD, Tedesco P, Johnson TE, Walker DW, Lithgow G, Kim S, Link CD: **Identification of a novel cis-regulatory element involved in the heat shock response in *Caenorhabditis elegans* using microarray gene expression and computational methods.** *Genome research* 2002, **12**(5):701-712.
3. Bakowski MA, Desjardins CA, Smelkinson MG, Dunbar TL, Lopez-Moyado IF, Rifkin SA, Cuomo CA, Troemel ER: **Ubiquitin-mediated response to microsporidia and virus infection in *C. elegans*.** *PLoS pathogens* 2014, **10**(6):e1004200.
4. Nakad R, Snoek LB, Yang W, Ellendt S, Schneider F, Mohr TG, Rosingh L, Masche AC, Rosenstiel PC, Dierking K *et al*: **Contrasting invertebrate immune defense behaviors caused by a single gene, the *Caenorhabditis elegans* neuropeptide receptor gene *npr-1*.** *BMC genomics* 2016, **17**:280.
5. Guisbert E, Czyz DM, Richter K, McMullen PD, Morimoto RI: **Identification of a tissue-selective heat shock response regulatory network.** *PLoS genetics* 2013, **9**(4):e1003466.
6. Vinuela A, Snoek LB, Riksen JA, Kammenga JE: **Gene expression modifications by temperature-toxicants interactions in *Caenorhabditis elegans*.** *PloS one* 2011, **6**(9):e24676.
7. Golden TR, Melov S: **Microarray analysis of gene expression with age in individual nematodes.** *Aging cell* 2004, **3**(3):111-124.
8. Kim D, Grun D, van Oudenaarden A: **Dampening of expression oscillations by synchronous regulation of a microRNA and its target.** *Nature genetics* 2013, **45**(11):1337-1344.
9. Snoek LB, Sterken MG, Volkers RJ, Klatter M, Bosman KJ, Bevers RP, Riksen JA, Smant G, Cossins AR, Kammenga JE: **A rapid and massive gene expression shift marking adolescent transition in *C. elegans*.** *Scientific reports* 2014, **4**:3912.
10. Jansen RC, Nap JP: **Genetical genomics: the added value from segregation.** *Trends in genetics : TIG* 2001, **17**(7):388-391.
11. Li Y, Breitling R, Jansen RC: **Generalizing genetical genomics: getting added value from environmental perturbation.** *Trends in genetics : TIG* 2008, **24**(10):518-524.
12. Li Y, Alvarez OA, Gutteling EW, Tijsterman M, Fu J, Riksen JA, Hazendonk E, Prins P, Plasterk RH, Jansen RC *et al*: **Mapping determinants of gene expression plasticity by genetical genomics in *C. elegans*.** *PLoS genetics* 2006, **2**(12):e222.
13. Hendriks GJ, Gaidatzis D, Aeschmann F, Grosshans H: **Extensive oscillatory gene expression during *C. elegans* larval development.** *Molecular cell* 2014, **53**(3):380-392.
14. Capra EJ, Skrovanek SM, Kruglyak L: **Comparative developmental expression profiling of two *C. elegans* isolates.** *PloS one* 2008, **3**(12):e4055.
15. Francesconi M, Lehner B: **The effects of genetic variation on gene expression dynamics during development.** *Nature* 2014, **505**(7482):208-211.
16. Paaby AB, Rockman MV: **Cryptic genetic variation: evolution's hidden substrate.** *Nature reviews Genetics* 2014, **15**(4):247-258.
17. Ledon-Rettig CC, Pfennig DW, Chunco AJ, Dworkin I: **Cryptic genetic variation in natural populations: a predictive framework.** *Integrative and comparative biology* 2014, **54**(5):783-793.
18. Iwasaki WM, Tsuda ME, Kawata M: **Genetic and environmental factors affecting cryptic variations in gene regulatory networks.** *BMC evolutionary biology* 2013, **13**:91.
19. Rodriguez M, Snoek LB, Riksen JA, Bevers RP, Kammenga JE: **Genetic variation for stress-response hormesis in *C. elegans* lifespan.** *Experimental gerontology* 2012, **47**(8):581-587.
20. Gaertner BE, Parmenter MD, Rockman MV, Kruglyak L, Phillips PC: **More than the sum of its parts: a complex epistatic network underlies natural variation in thermal preference behavior in *Caenorhabditis elegans*.** *Genetics* 2012, **192**(4):1533-1542.
21. Glauser DA, Chen WC, Agin R, Macinnis BL, Hellman AB, Garrity PA, Tan MW, Goodman MB: **Heat avoidance is regulated by transient receptor potential (TRP) channels and a neuropeptide signaling pathway in *Caenorhabditis elegans*.** *Genetics* 2011, **188**(1):91-103.
22. Thompson OA, Snoek LB, Nijveen H, Sterken MG, Volkers RJ, Brenchley R, Van't Hof A, Bevers RP, Cossins AR, Yanai I *et al*: **Remarkably Divergent Regions Punctuate the Genome Assembly of the *Caenorhabditis elegans* Hawaiian Strain CB4856.** *Genetics* 2015, **200**(3):975-989.
23. Brenner S: **The genetics of *Caenorhabditis elegans*.** *Genetics* 1974, **77**(1):71-94.
24. Rockman MV, Kruglyak L: **Recombinational landscape and population genomics of *Caenorhabditis elegans*.** *PLoS genetics* 2009, **5**(3):e1000419.
25. Zahurak M, Parmigiani G, Yu W, Scharpf RB, Berman D, Schaeffer E, Shabbeer S, Cope L: **Pre-processing Agilent microarray data.** *BMC bioinformatics* 2007, **8**:142.



26. Smyth GK, Speed T: **Normalization of cDNA microarray data**. *Methods* 2003, **31**(4):265-273.
27. Benjamini Y, Yekutieli D: **The control of the false discovery rate in multiple testing under dependency**. *Ann Stat* 2001, **29**(4):1165-1188.
28. Rockman MV, Skrovanek SS, Kruglyak L: **Selection at linked sites shapes heritable phenotypic variation in *C. elegans***. *Science* 2010, **330**(6002):372-376.
29. Harris TW, Baran J, Bieri T, Cabunoc A, Chan J, Chen WJ, Davis P, Done J, Grove C, Howe K *et al*: **WormBase 2014: new views of curated biology**. *Nucleic acids research* 2014, **42**(Database issue):D789-793.
30. Gerstein MB, Lu ZJ, Van Nostrand EL, Cheng C, Arshinoff BI, Liu T, Yip KY, Robilotto R, Rechtsteiner A, Ikegami K *et al*: **Integrative analysis of the *Caenorhabditis elegans* genome by the modENCODE project**. *Science* 2010, **330**(6012):1775-1787.
31. Niu W, Lu ZJ, Zhong M, Sarov M, Murray JI, Brdlik CM, Janette J, Chen C, Alves P, Preston E *et al*: **Diverse transcription factor binding features revealed by genome-wide ChIP-seq in *C. elegans***. *Genome research* 2011, **21**(2):245-254.
32. Tepper RG, Ashraf J, Kaletsky R, Kleemann G, Murphy CT, Bussemaker HJ: **PQM-1 complements DAF-16 as a key transcriptional regulator of DAF-2-mediated development and longevity**. *Cell* 2013, **154**(3):676-690.
33. Ogata H, Goto S, Sato K, Fujibuchi W, Bono H, Kanehisa M: **KEGG: Kyoto Encyclopedia of Genes and Genomes**. *Nucleic acids research* 1999, **27**(1):29-34.
34. Brunquell J, Morris S, Lu Y, Cheng F, Westerheide SD: **The genome-wide role of HSF-1 in the regulation of gene expression in *Caenorhabditis elegans***. *BMC genomics* 2016, **17**:559.
35. Gan X, Stegle O, Behr J, Steffen JG, Drewe P, Hildebrand KL, Lyngsoe R, Schultheiss SJ, Osborne EJ, Sreedharan VT *et al*: **Multiple reference genomes and transcriptomes for *Arabidopsis thaliana***. *Nature* 2011, **477**(7365):419-423.
36. Keurentjes JJ, Fu J, Terpstra IR, Garcia JM, van den Ackerveken G, Snoek LB, Peeters AJ, Vreugdenhil D, Koornneef M, Jansen RC: **Regulatory network construction in *Arabidopsis* by using genome-wide gene expression quantitative trait loci**. *Proceedings of the National Academy of Sciences of the United States of America* 2007, **104**(5):1708-1713.
37. Snoek LB, Terpstra IR, Dekter R, Van den Ackerveken G, Peeters AJ: **Genetical Genomics Reveals Large Scale Genotype-By-Environment Interactions in *Arabidopsis thaliana***. *Frontiers in genetics* 2012, **3**:317.
38. Alberts R, Terpstra P, Li Y, Breitling R, Nap JP, Jansen RC: **Sequence polymorphisms cause many false cis eQTLs**. *PloS one* 2007, **2**(7):e622.
39. Thompson O, Edgley M, Strasbourger P, Flibotte S, Ewing B, Adair R, Au V, Chaudhry I, Fernando L, Hutter H *et al*: **The million mutation project: a new approach to genetics in *Caenorhabditis elegans***. *Genome research* 2013, **23**(10):1749-1762.
40. Volkens RJ, Snoek LB, Hubar CJ, Coopman R, Chen W, Yang W, Sterken MG, Schulenburg H, Braeckman BP, Kammenga JE: **Gene-environment and protein-degradation signatures characterize genomic and phenotypic diversity in wild *Caenorhabditis elegans* populations**. *BMC biology* 2013, **11**:93.
41. Panousis NI, Gutierrez-Arcelus M, Dermitzakis ET, Lappalainen T: **Allelic mapping bias in RNA-sequencing is not a major confounder in eQTL studies**. *Genome biology* 2014, **15**(9):467.
42. Chen K, van Nimwegen E, Rajewsky N, Siegal ML: **Correlating gene expression variation with cis-regulatory polymorphism in *Saccharomyces cerevisiae***. *Genome biology and evolution* 2010, **2**:697-707.
43. Vinuela A, Snoek LB, Riksen JA, Kammenga JE: **Genome-wide gene expression regulation as a function of genotype and age in *C. elegans***. *Genome research* 2010, **20**(7):929-937.
44. Terpstra IR, Snoek LB, Keurentjes JJ, Peeters AJ, van den Ackerveken G: **Regulatory network identification by genetical genomics: signaling downstream of the *Arabidopsis* receptor-like kinase ERECTA**. *Plant physiology* 2010, **154**(3):1067-1078.
45. Smith EN, Kruglyak L: **Gene-environment interaction in yeast gene expression**. *PLoS biology* 2008, **6**(4):e83.
46. Grundberg E, Small KS, Hedman AK, Nica AC, Buil A, Keildson S, Bell JT, Yang TP, Meduri E, Barrett A *et al*: **Mapping cis- and trans-regulatory effects across multiple tissues in twins**. *Nature genetics* 2012, **44**(10):1084-1089.
47. Stranger BE, Montgomery SB, Dimas AS, Parts L, Stegle O, Ingle CE, Sekowska M, Smith GD, Evans D, Gutierrez-Arcelus M *et al*: **Patterns of cis regulatory variation in diverse human populations**. *PLoS genetics* 2012, **8**(4):e1002639.



48. Gutteling EW, Doroszuk A, Riksen JA, Prokop Z, Reszka J, Kammenga JE: **Environmental influence on the genetic correlations between life-history traits in *Caenorhabditis elegans*.** *Heredity* 2007, **98**(4):206-213.
49. Gutteling EW, Riksen JA, Bakker J, Kammenga JE: **Mapping phenotypic plasticity and genotype-environment interactions affecting life-history traits in *Caenorhabditis elegans*.** *Heredity* 2007, **98**(1):28-37.
50. Kammenga JE, Doroszuk A, Riksen JA, Hazendonk E, Spiridon L, Petrescu AJ, Tijsterman M, Plasterk RH, Bakker J: **A *Caenorhabditis elegans* wild type defies the temperature-size rule owing to a single nucleotide polymorphism in *tra-3*.** *PLoS genetics* 2007, **3**(3):e34.
51. Duveau F, Felix MA: **Role of pleiotropy in the evolution of a cryptic developmental variation in *Caenorhabditis elegans*.** *PLoS biology* 2012, **10**(1):e1001230.
52. Sterken MG, Snoek LB, Kammenga JE, Andersen EC: **The laboratory domestication of *Caenorhabditis elegans*.** *Trends in genetics : TIG* 2015, **31**(5):224-231.
53. Andersen EC, Bloom JS, Gerke JP, Kruglyak L: **A variant in the neuropeptide receptor *npr-1* is a major determinant of *Caenorhabditis elegans* growth and physiology.** *PLoS genetics* 2014, **10**(2):e1004156.
54. Yvert G, Brem RB, Whittle J, Akey JM, Foss E, Smith EN, Mackelprang R, Kruglyak L: **Trans-acting regulatory variation in *Saccharomyces cerevisiae* and the role of transcription factors.** *Nature genetics* 2003, **35**(1):57-64.
55. Brem RB, Yvert G, Clinton R, Kruglyak L: **Genetic dissection of transcriptional regulation in budding yeast.** *Science* 2002, **296**(5568):752-755.
56. West MA, Kim K, Kliebenstein DJ, van Leeuwen H, Michelmore RW, Doerge RW, St Clair DA: **Global eQTL mapping reveals the complex genetic architecture of transcript-level variation in *Arabidopsis*.** *Genetics* 2007, **175**(3):1441-1450.

A

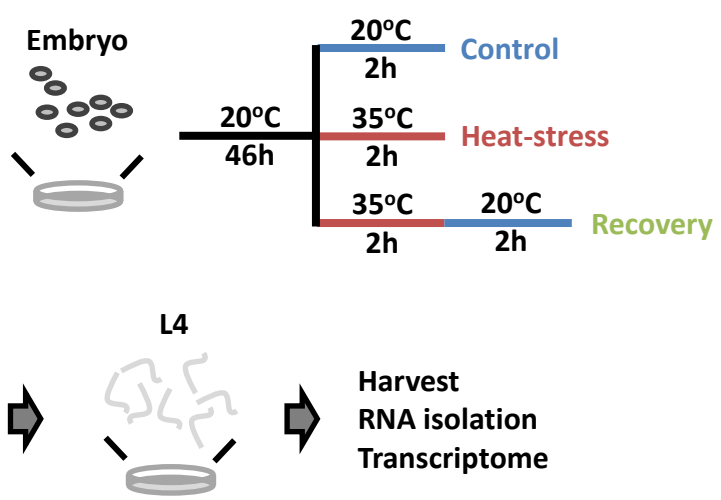

B

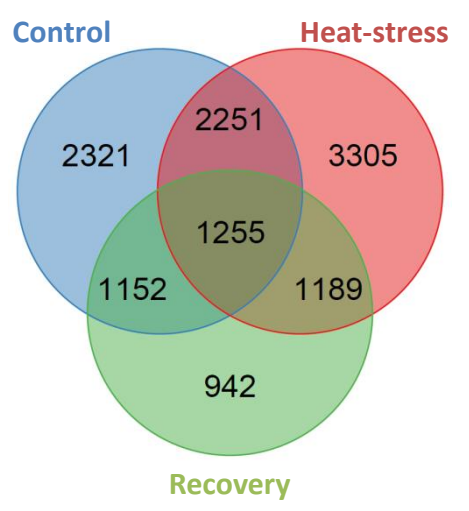

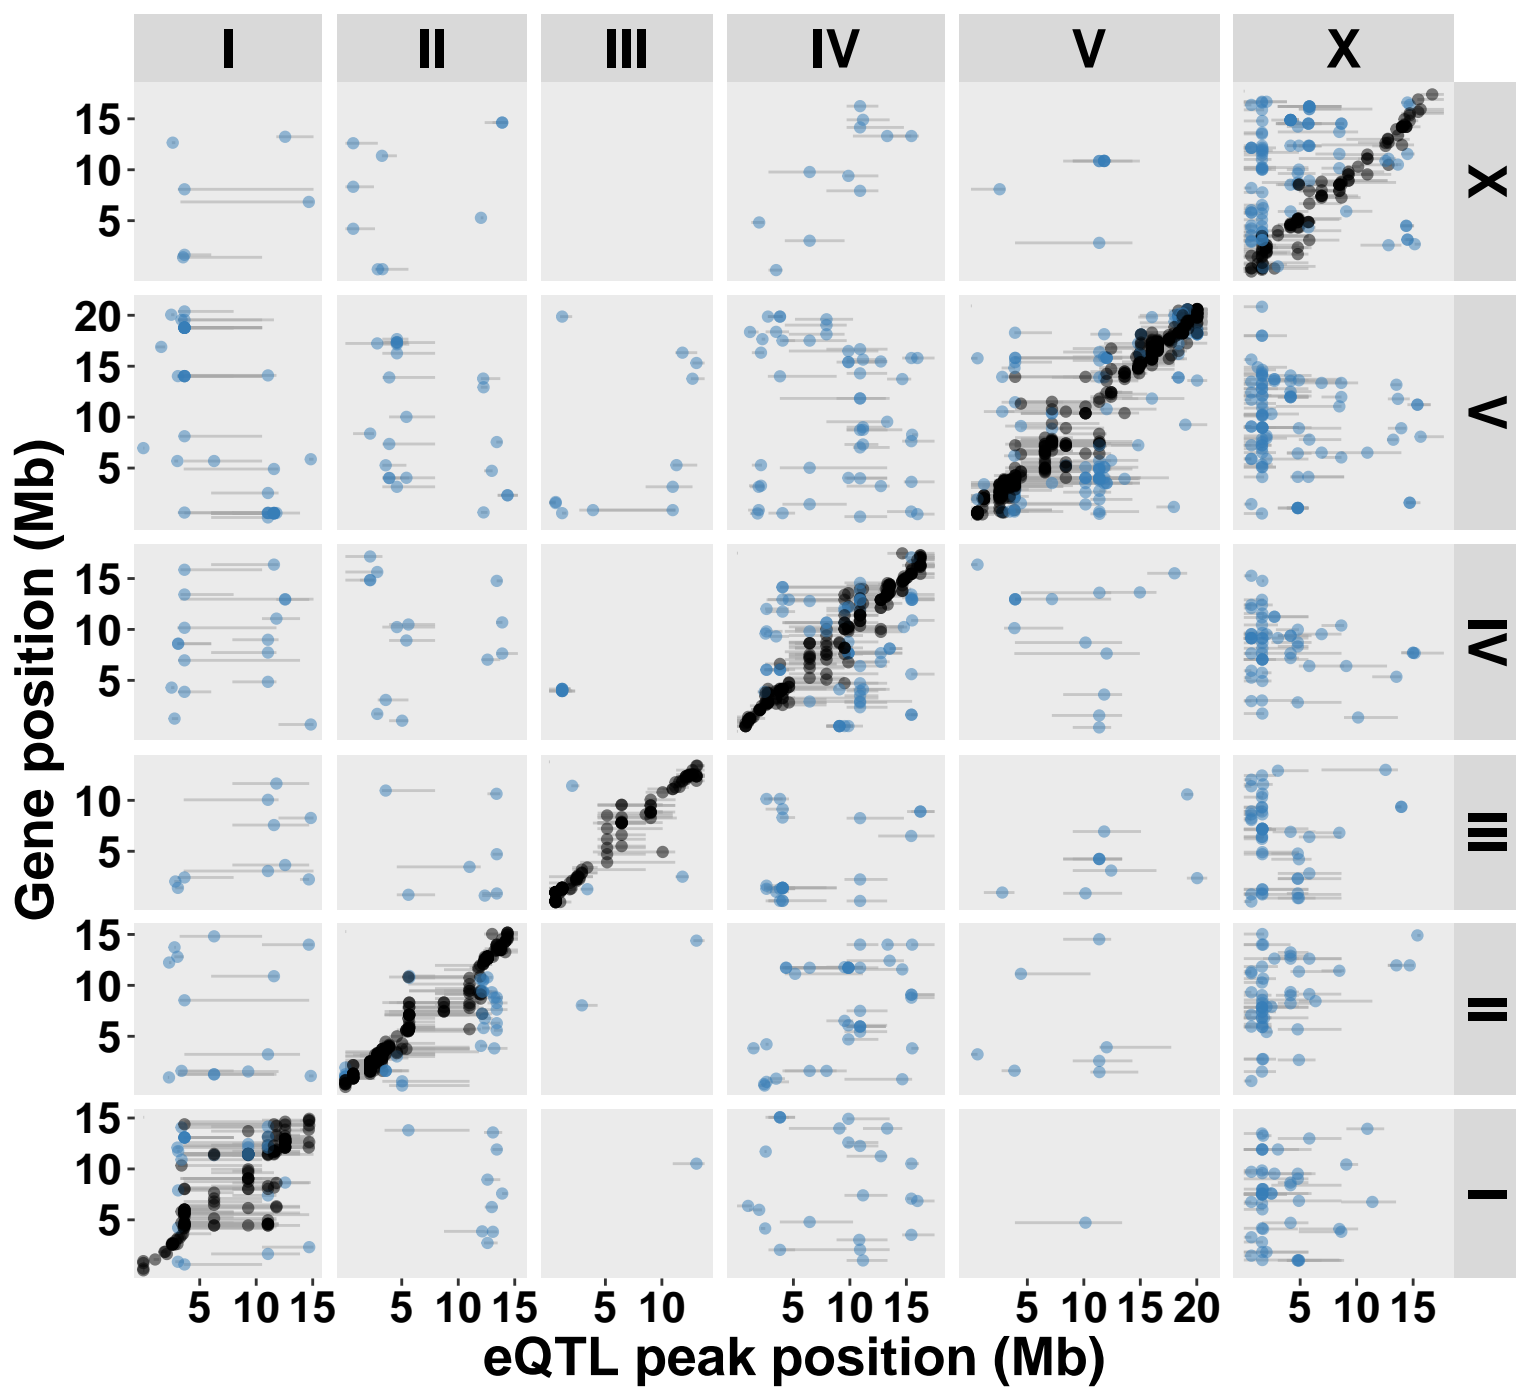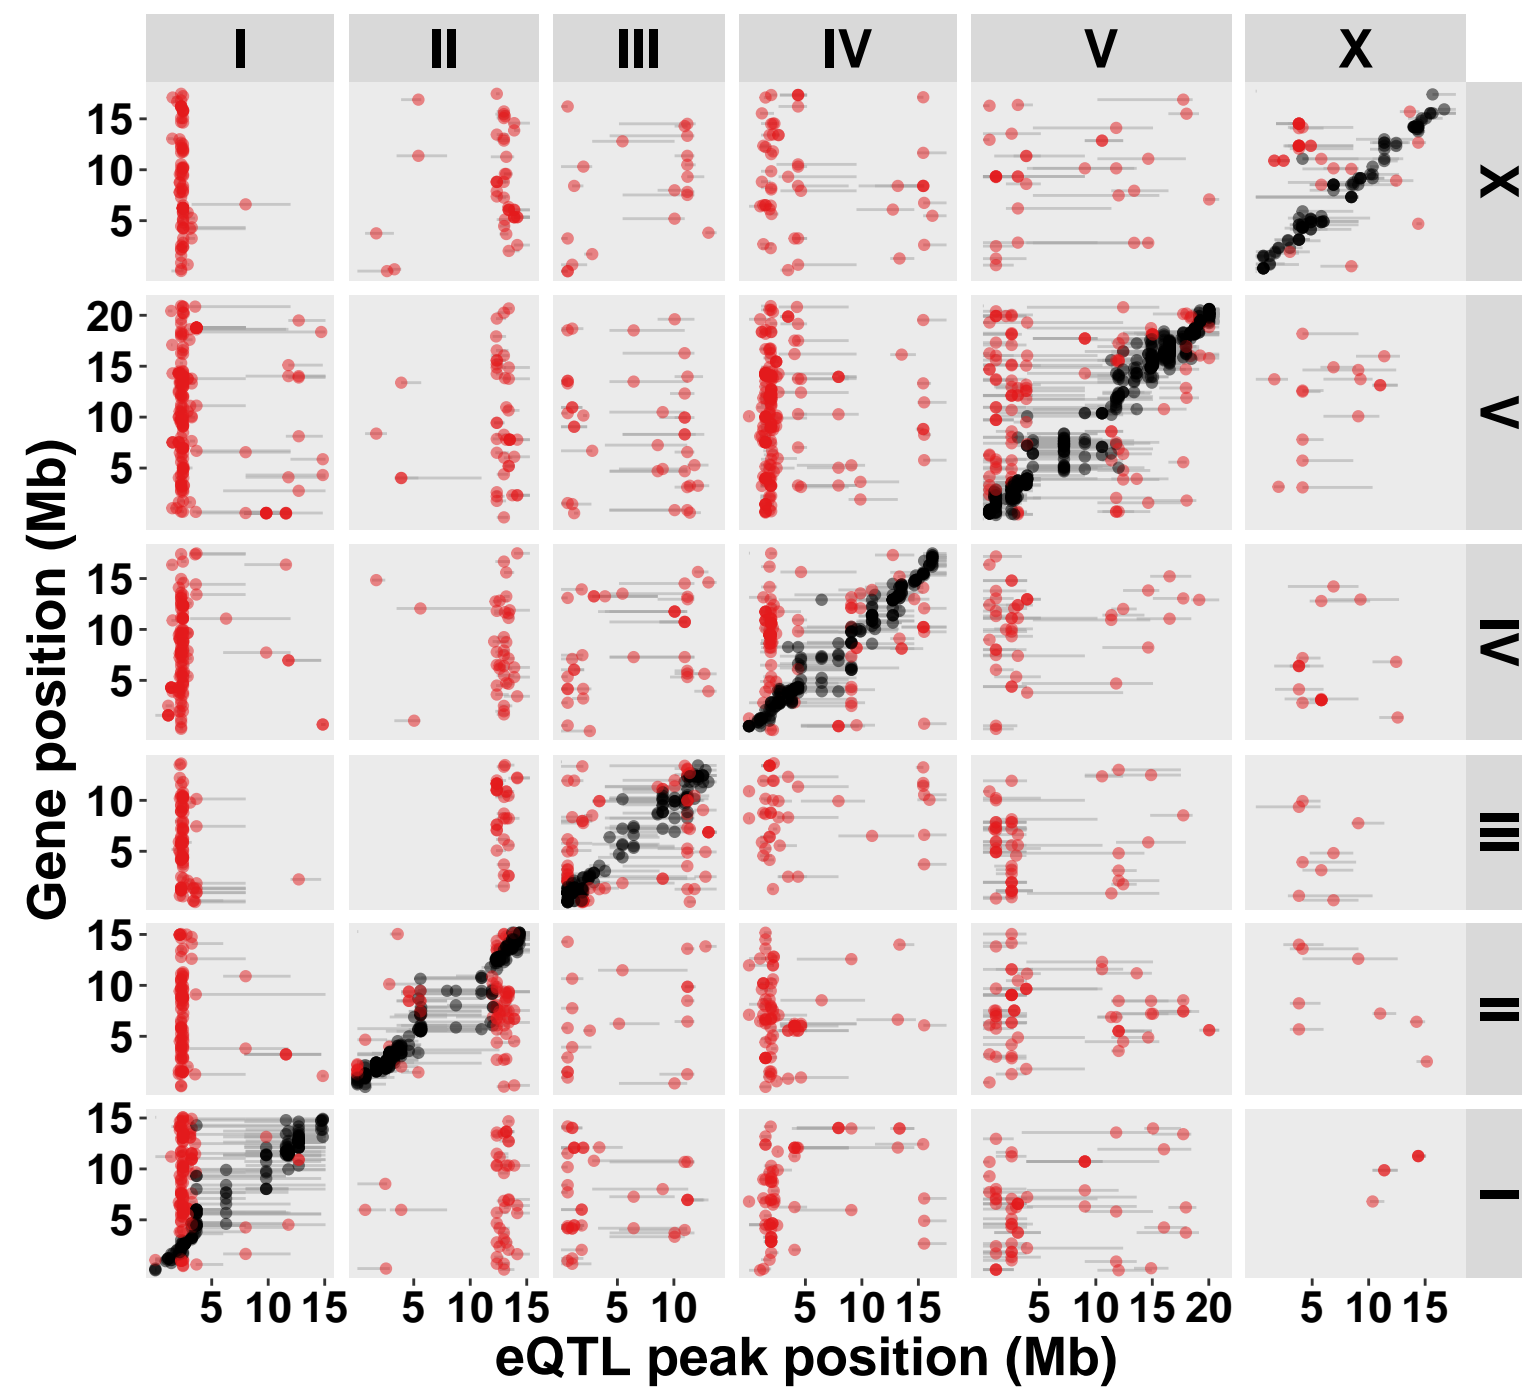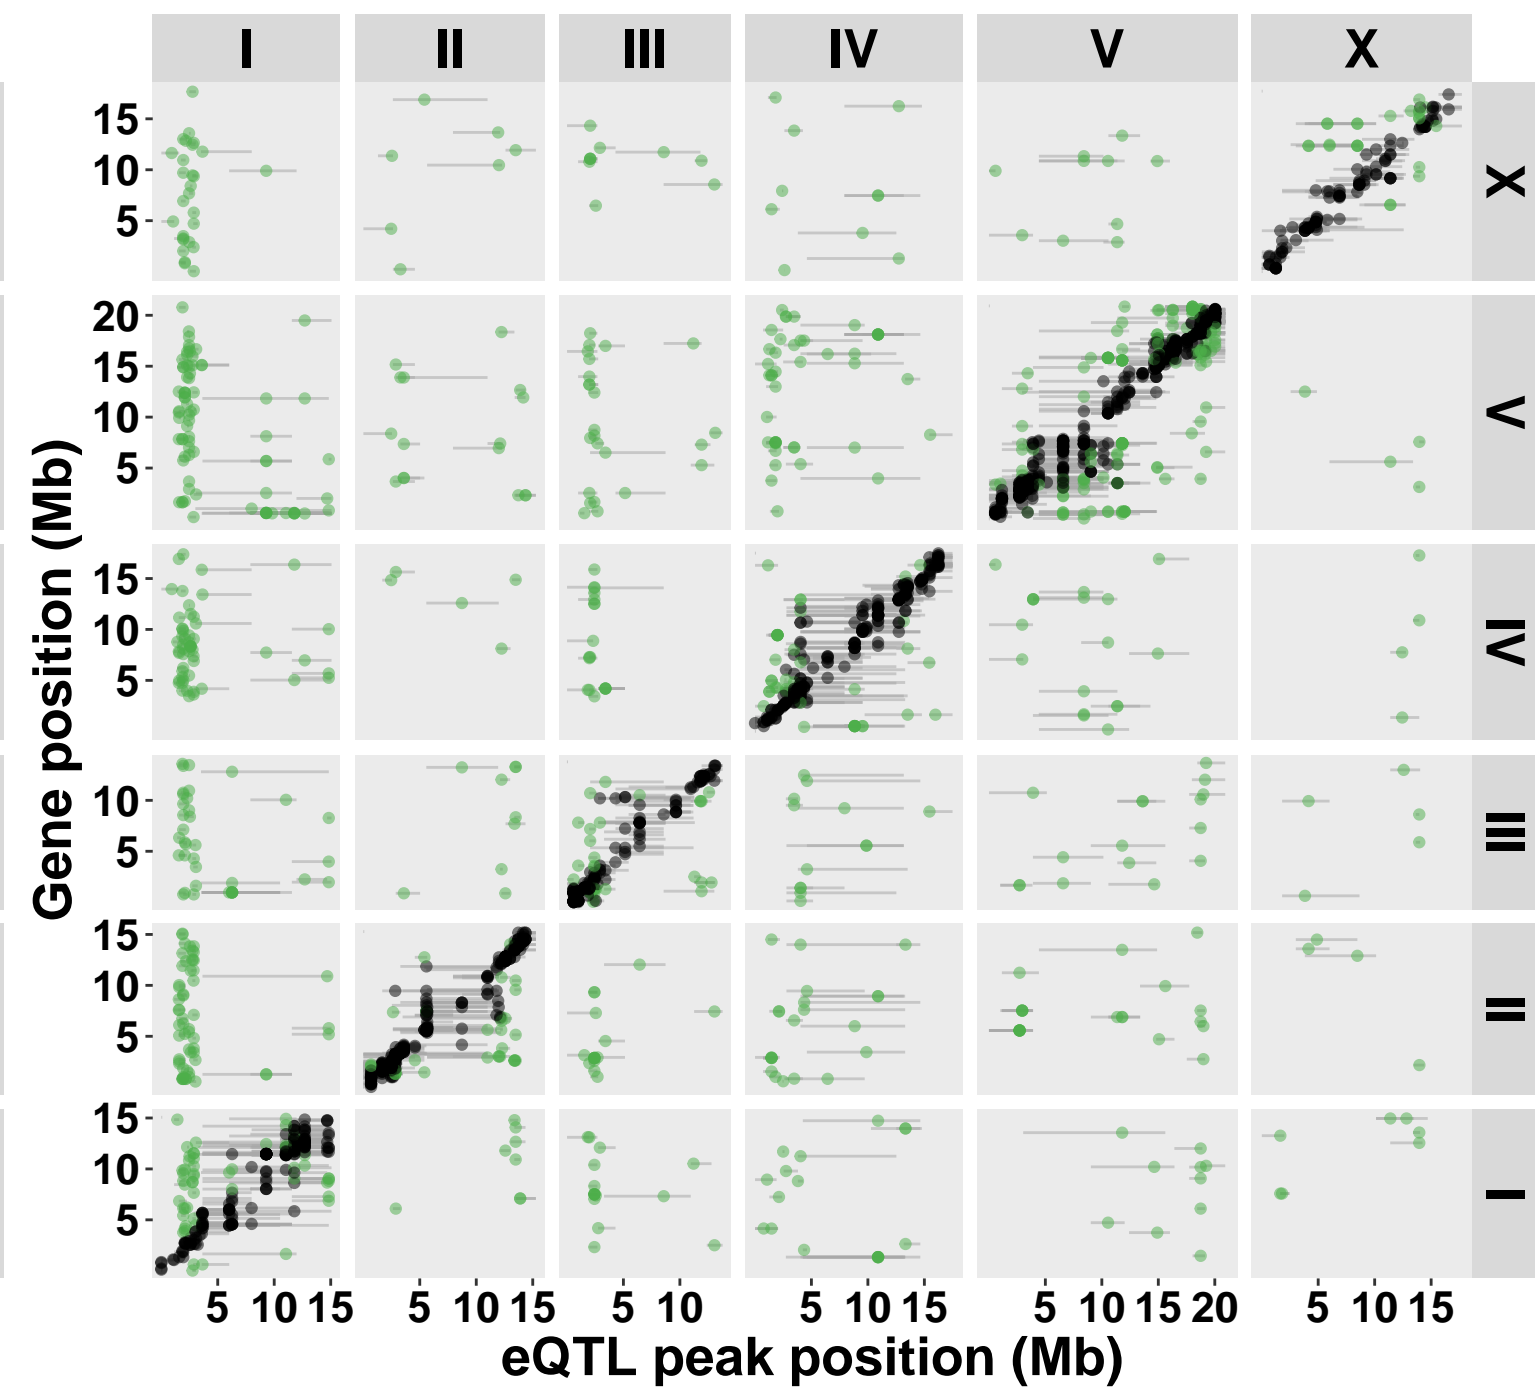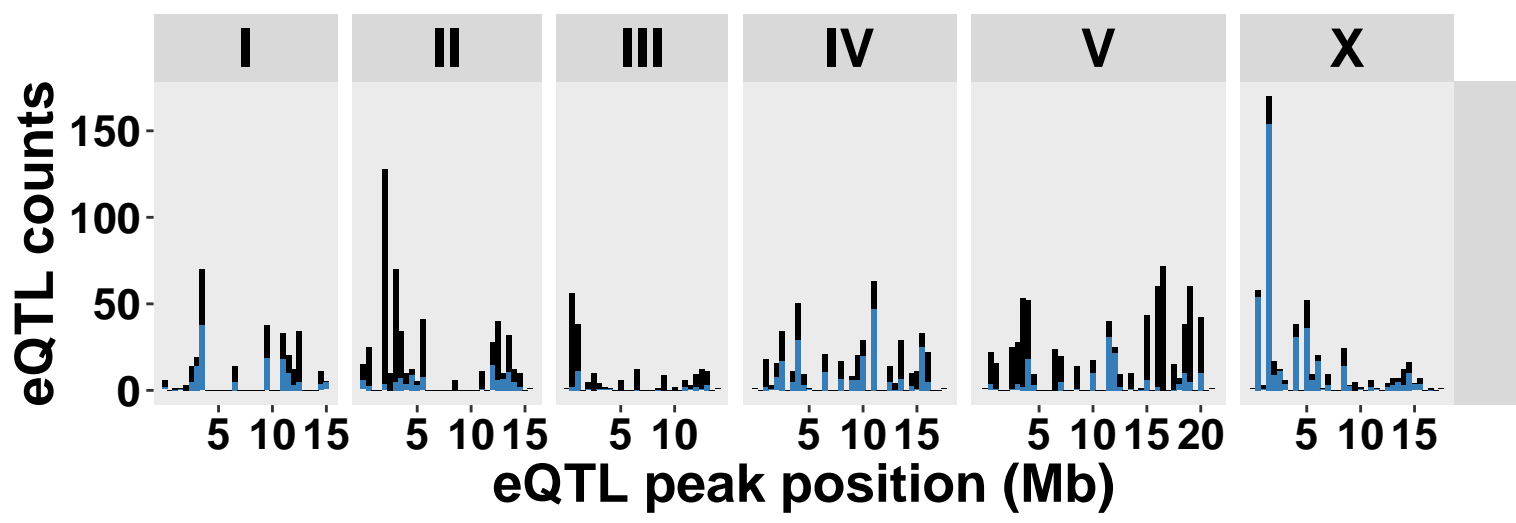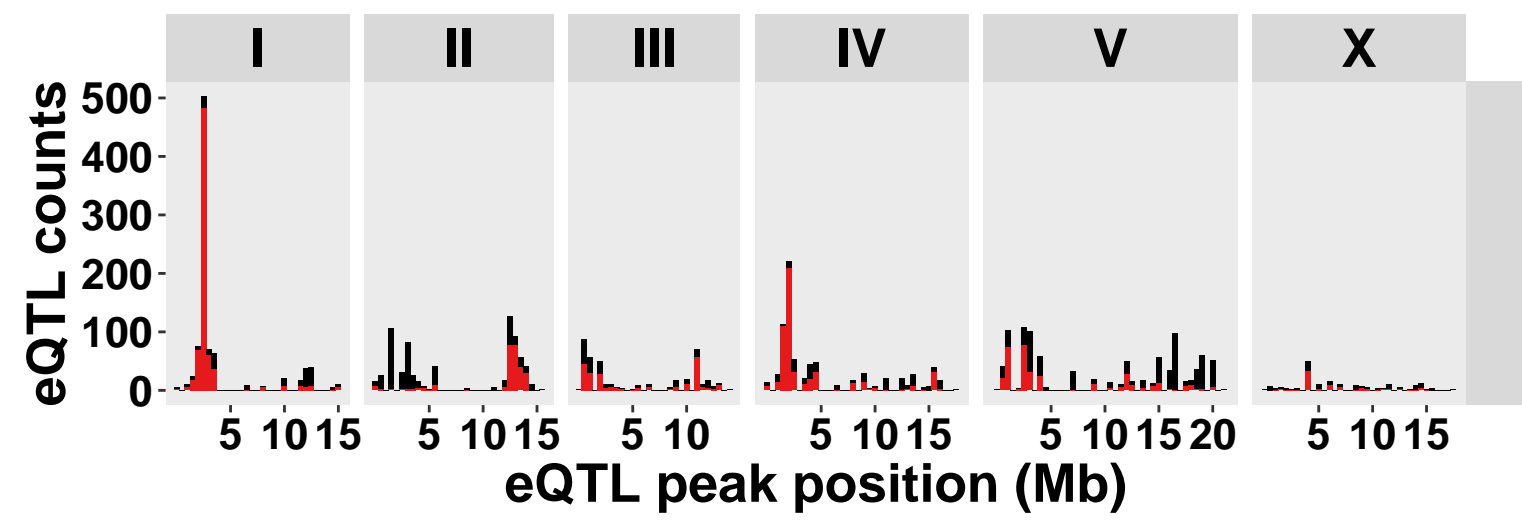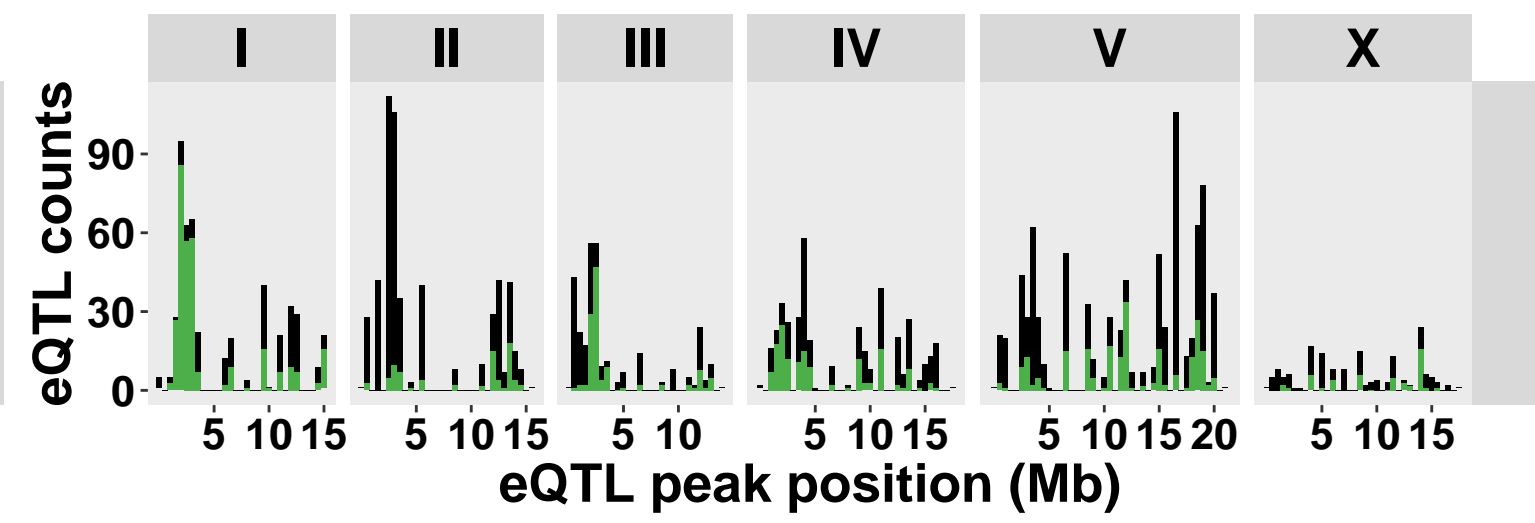

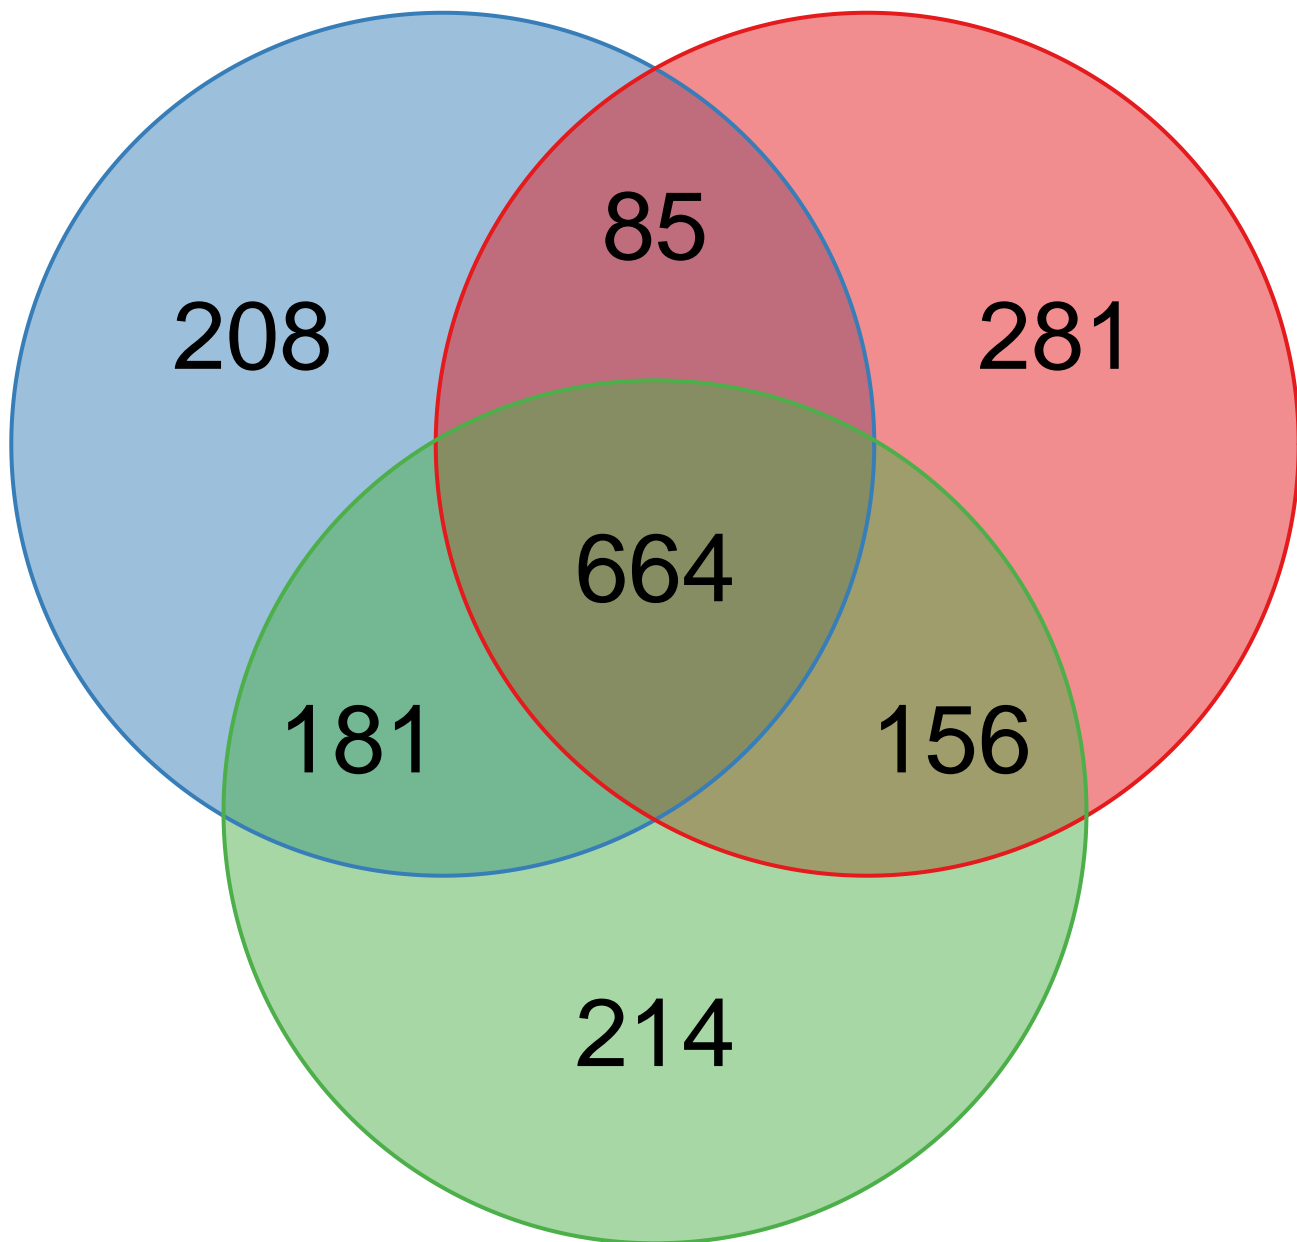

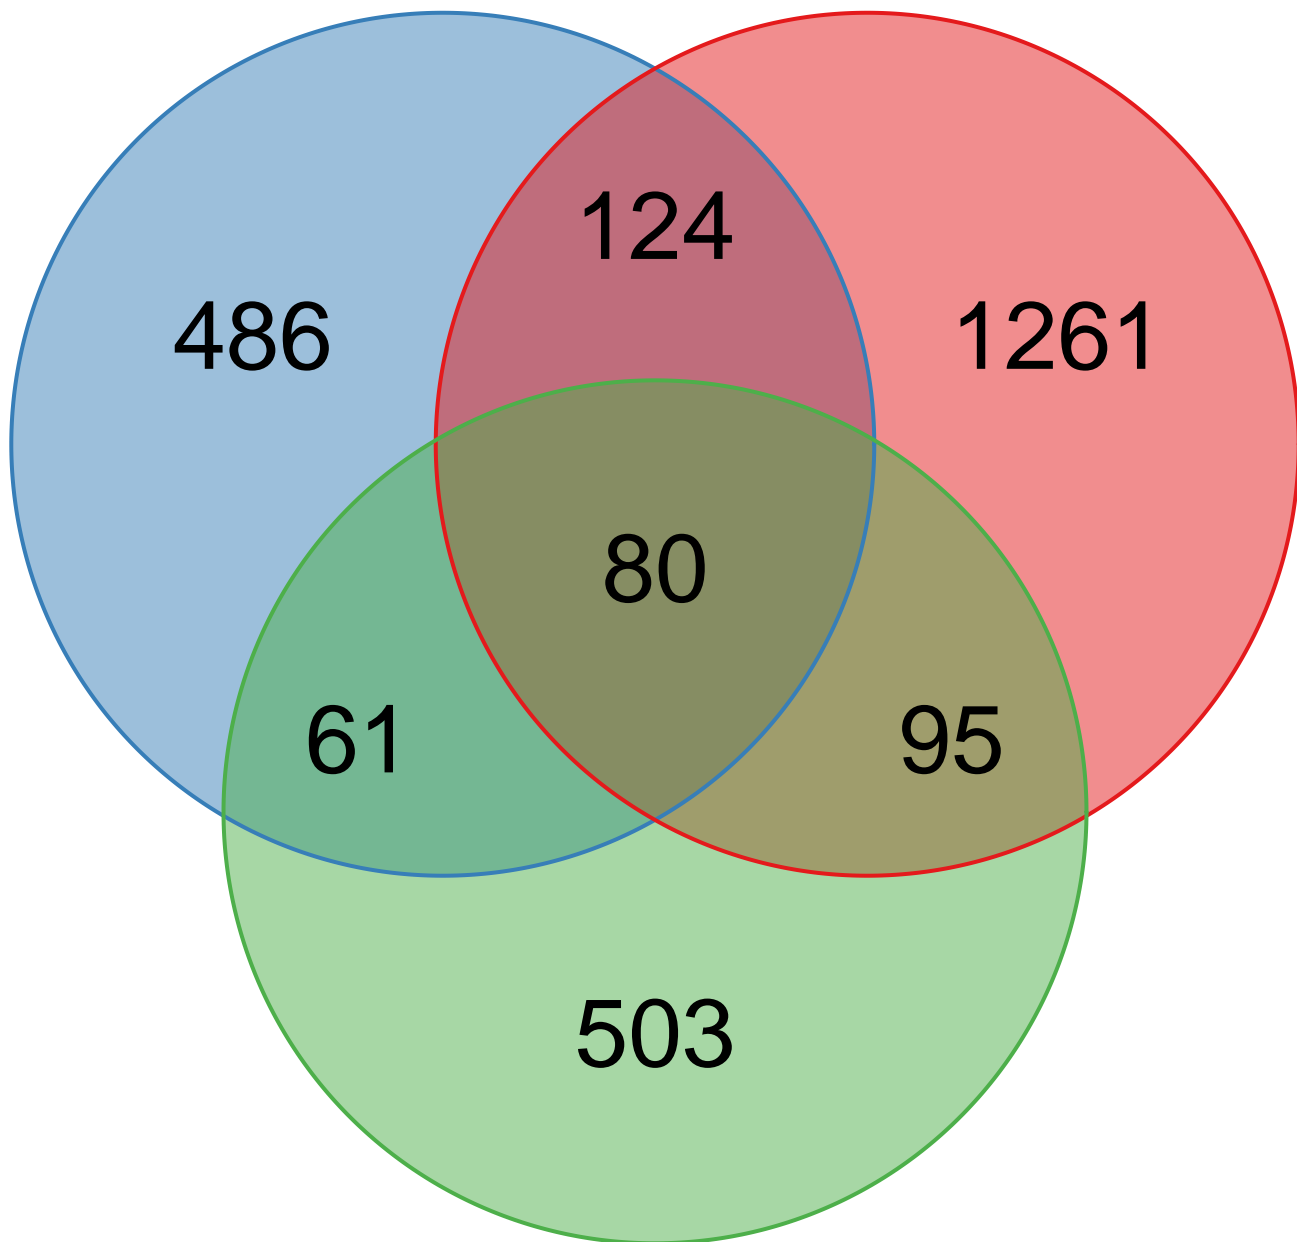

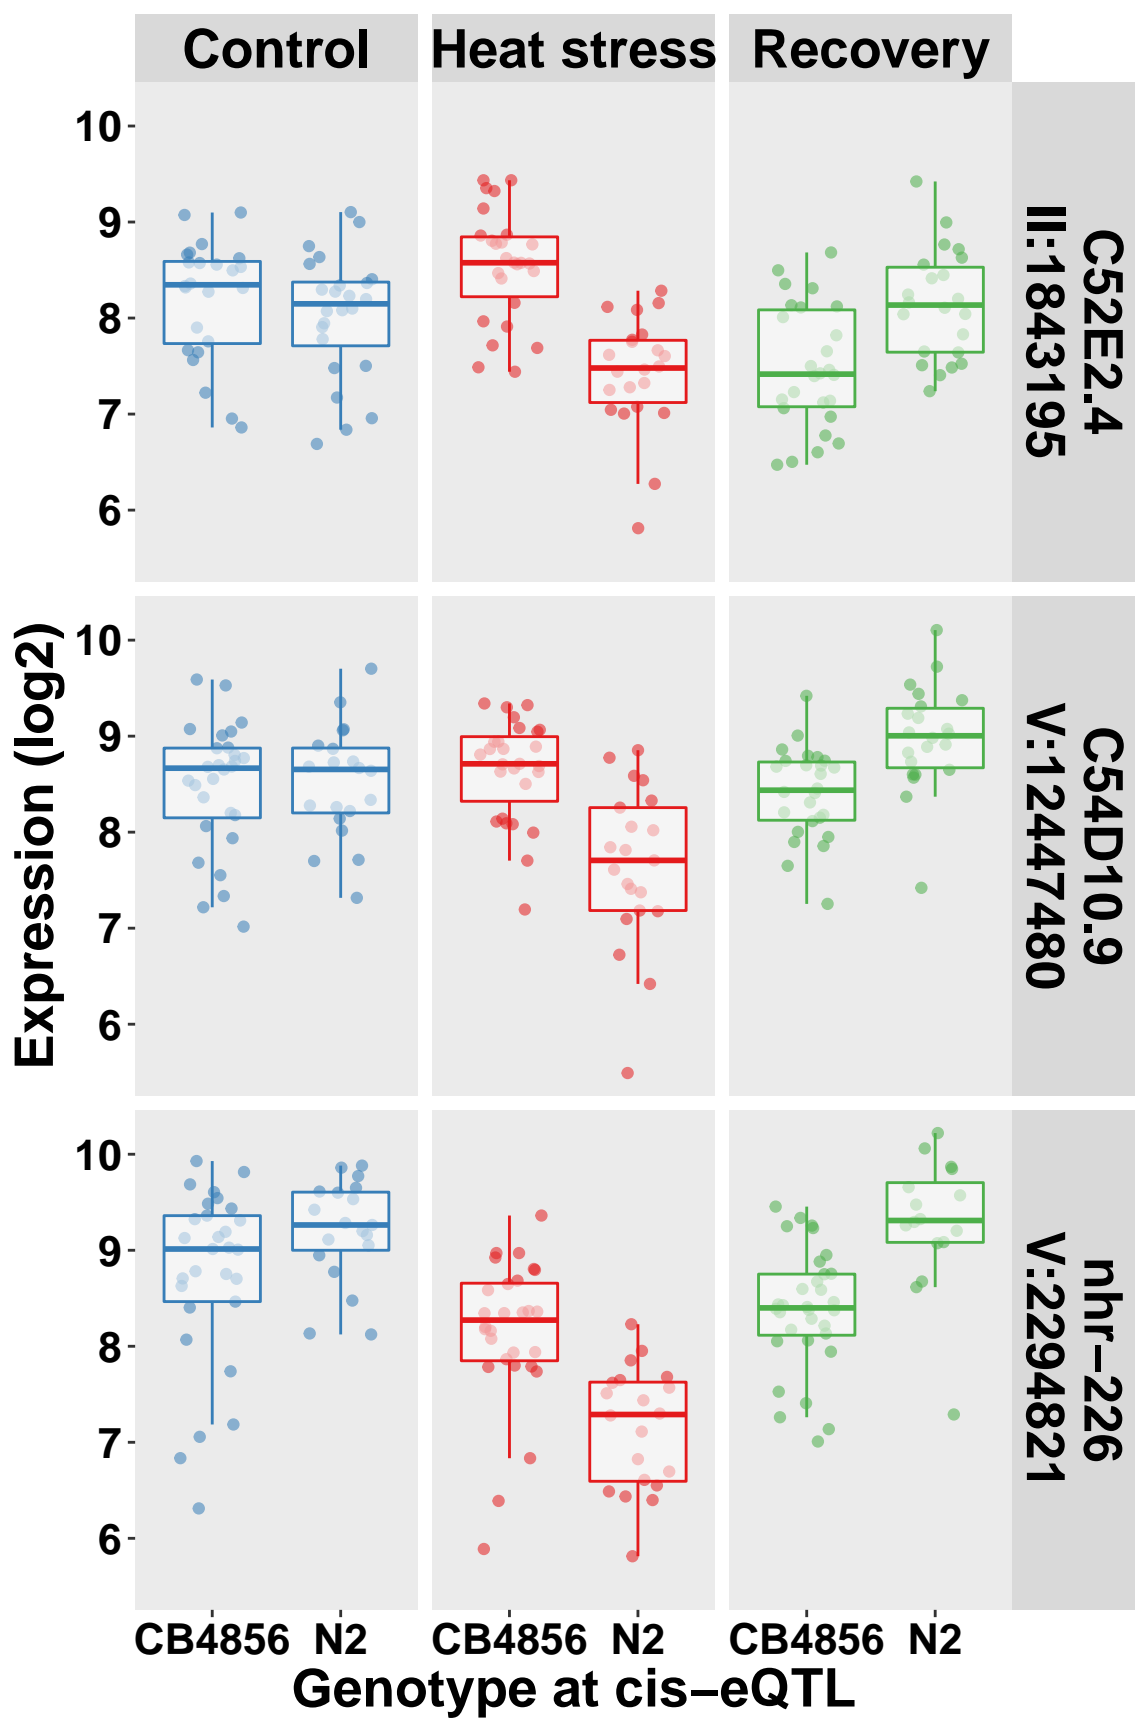

**A****Expression (log2)**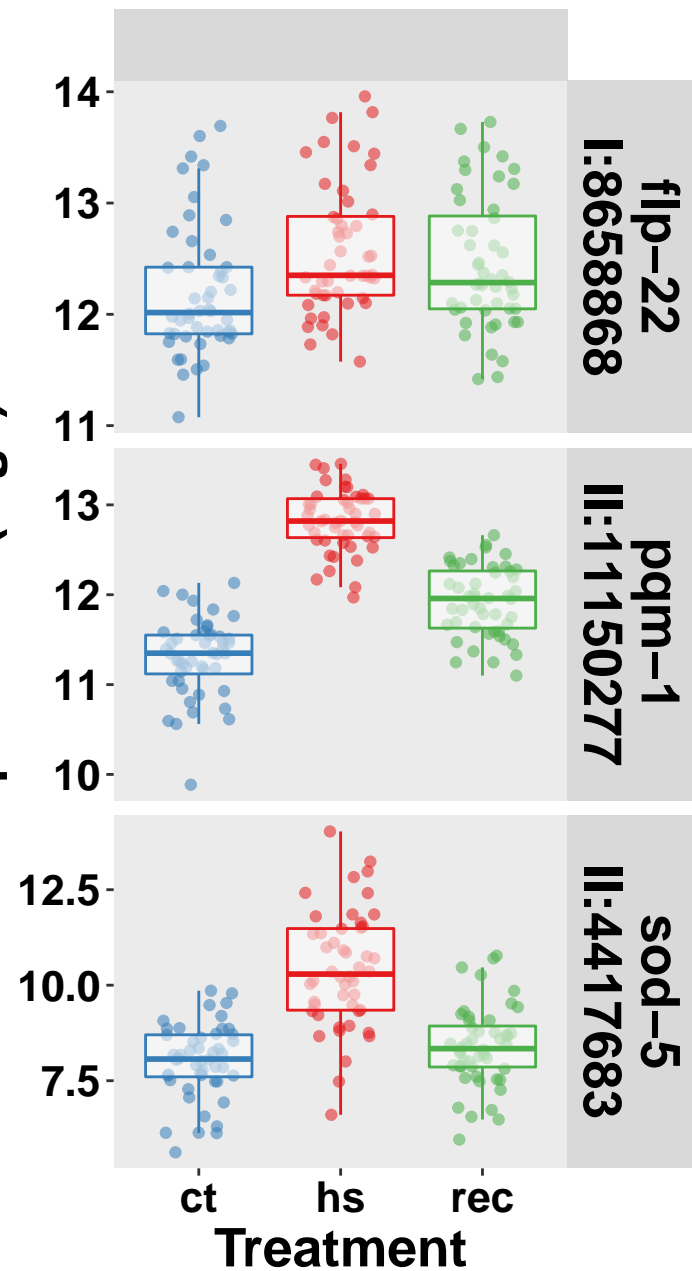**B**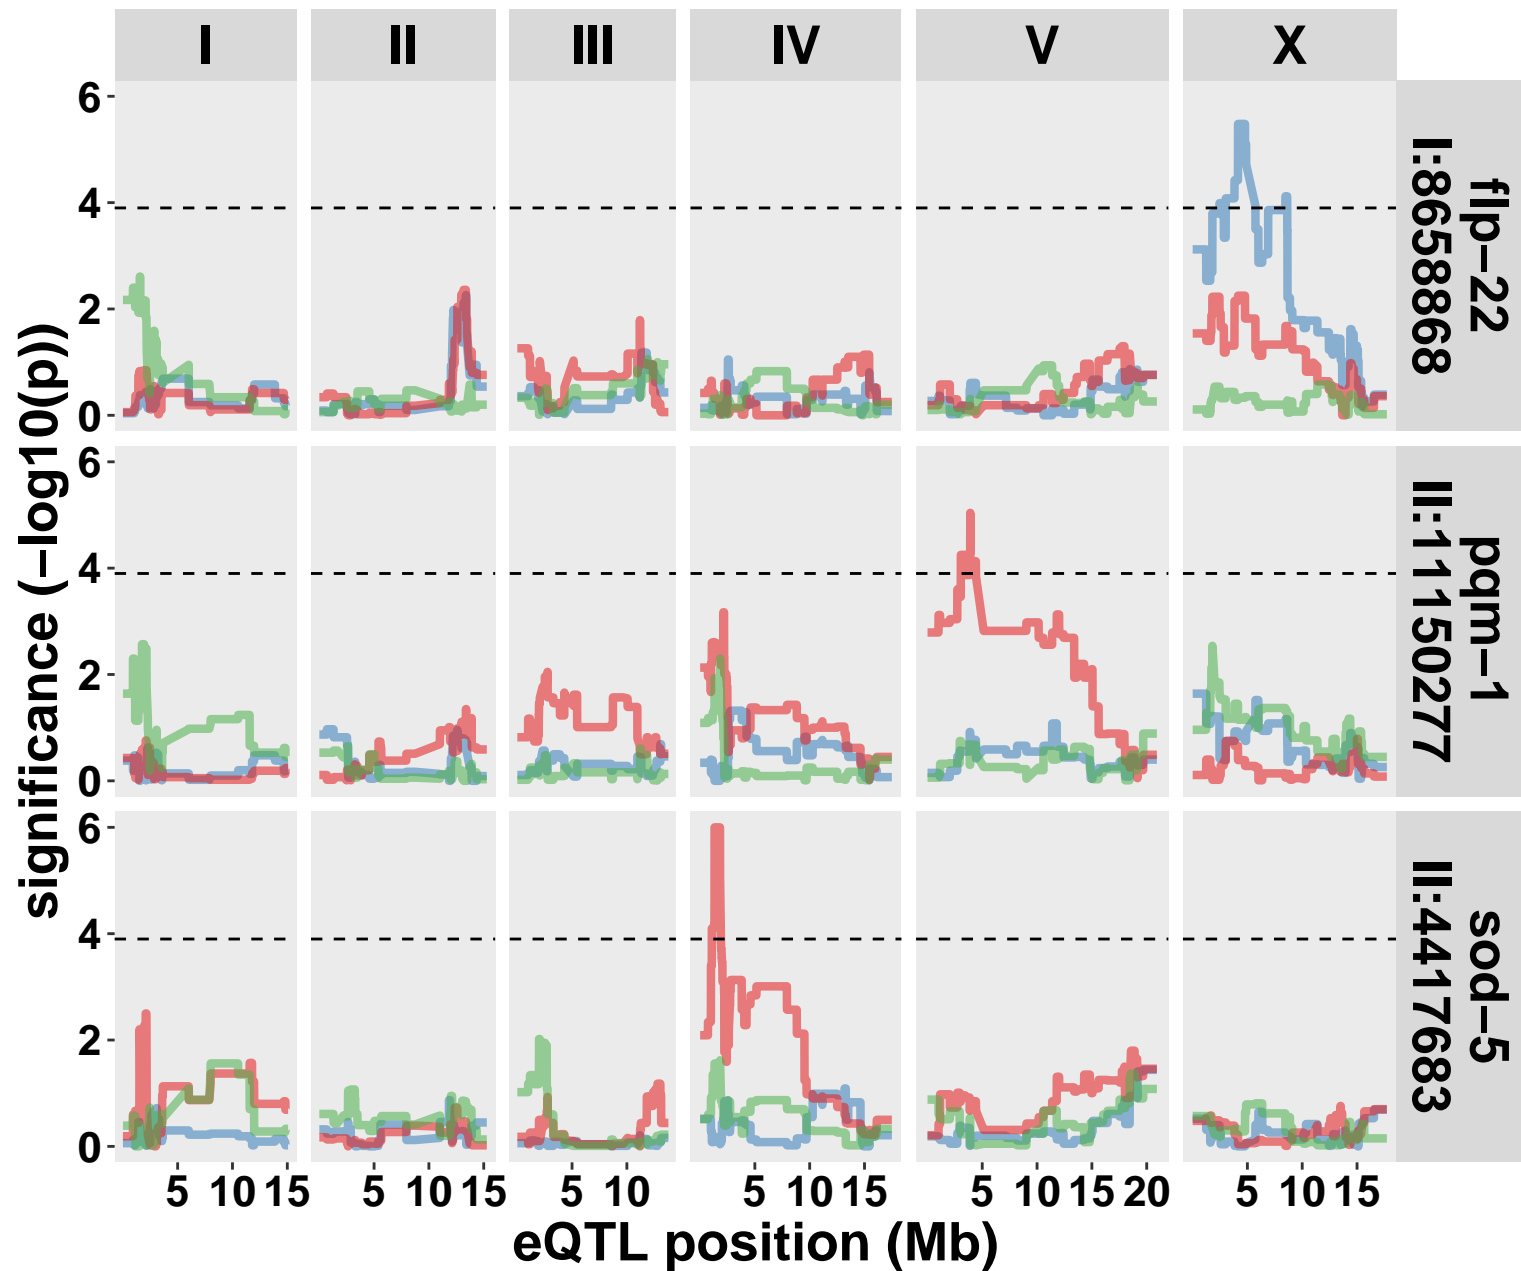

**A**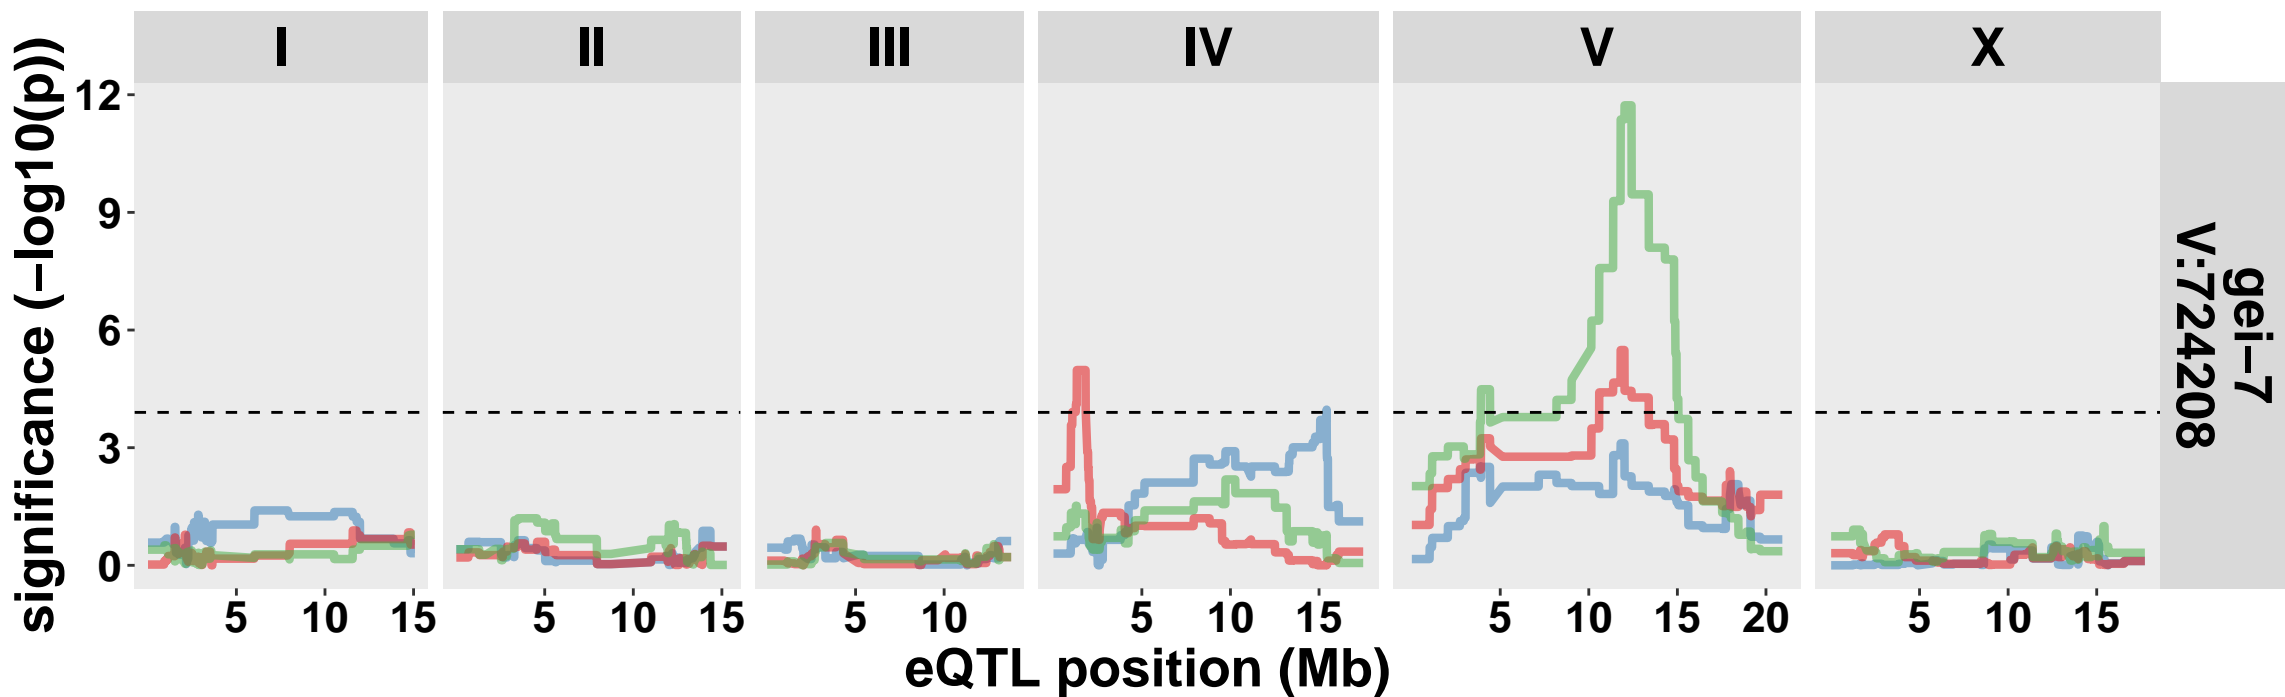**B**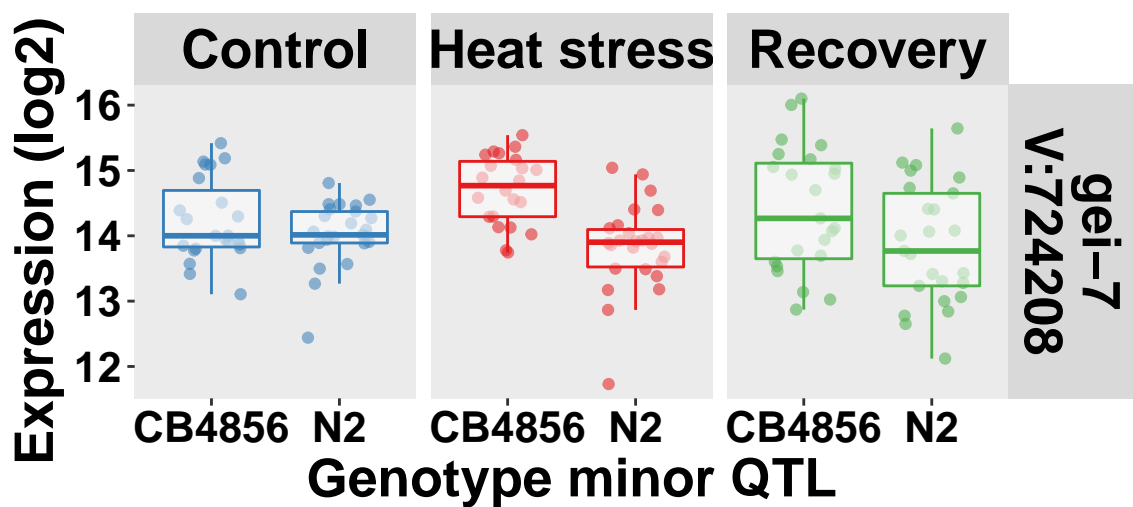**C**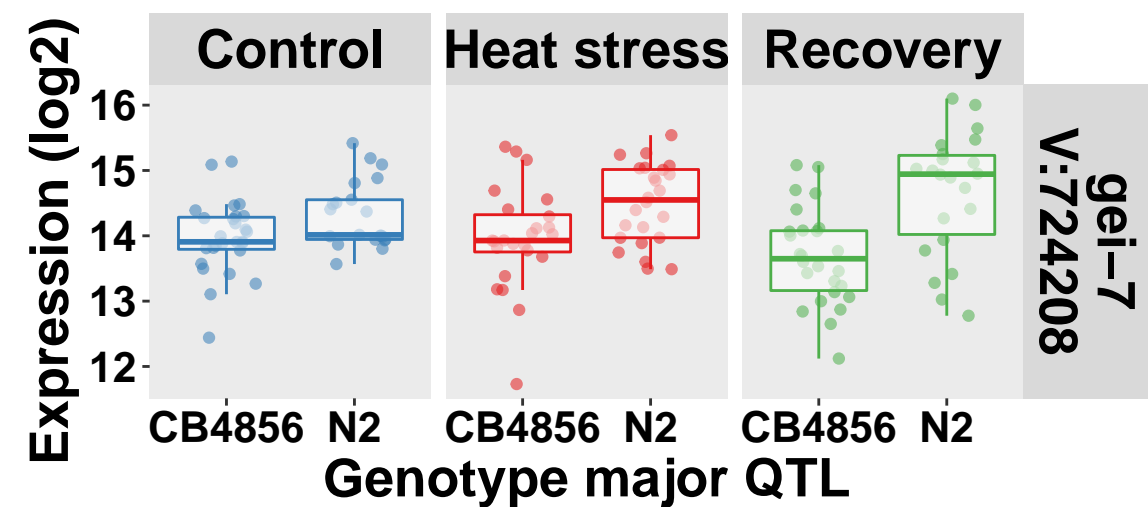



Count

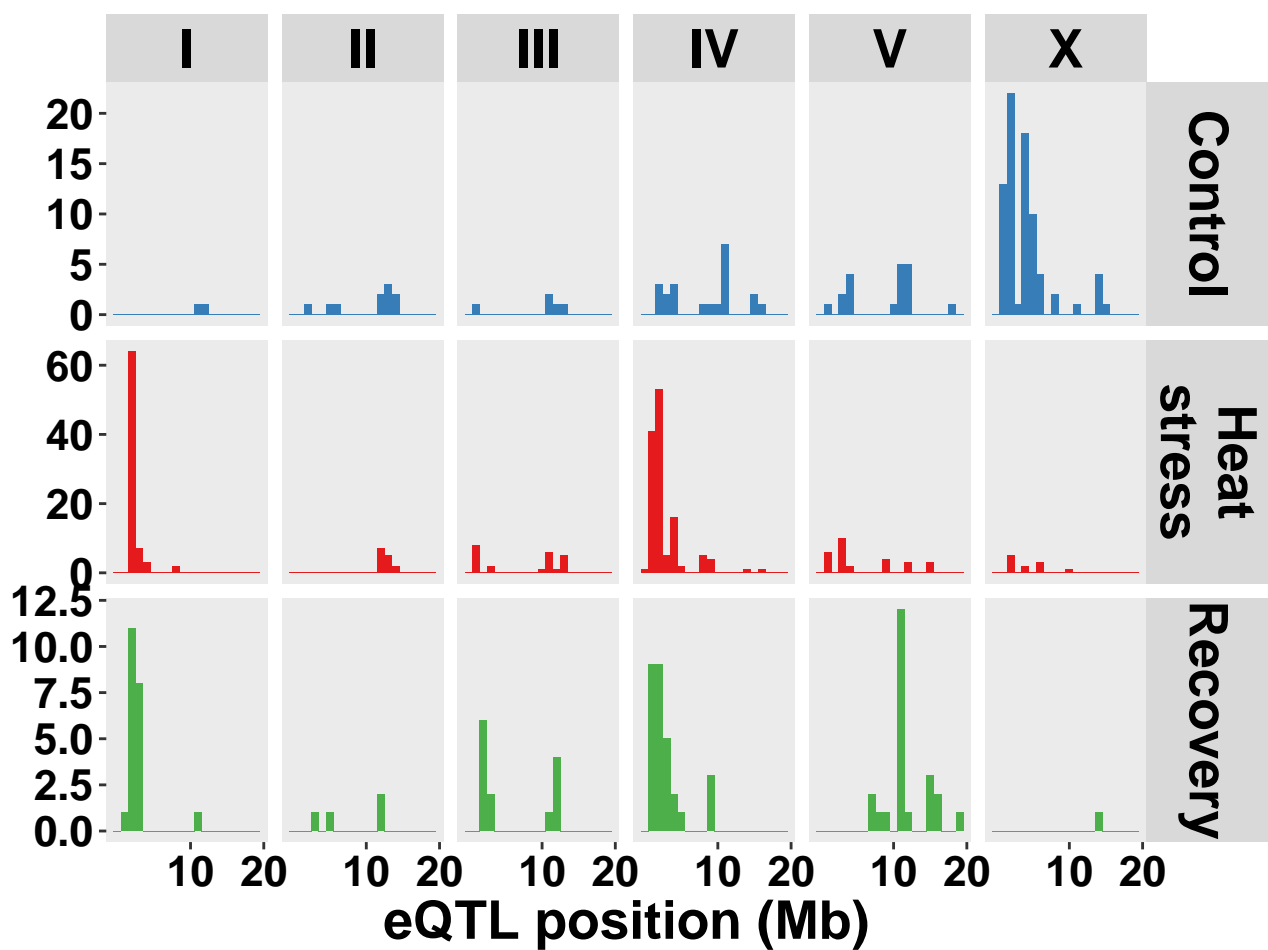

Source: http://biorxiv.org/content/10.1101/120147v1.full.pdf
